# Supplementary material
Source: PubMed Central journal article supplement (PMC10024266)

Supplementary Materials: Figure S1

Example of completed *My Top Goals Form*

## My Top Goals Form



Name: Paul Smith      Date: 14/05/2020

Card number: 21

**Goal 1:**

By the end of group,  
I will cook meals, such  
as spaghetti, at home by  
myself

---

---

---

---

---

---

---

---

Card number: 2

**Goal 2:**

I will make a friend my  
age who I can hang out  
with on weekends

---

---

---

---

---

---

---

---

MASTER COPY – Photocopy before use

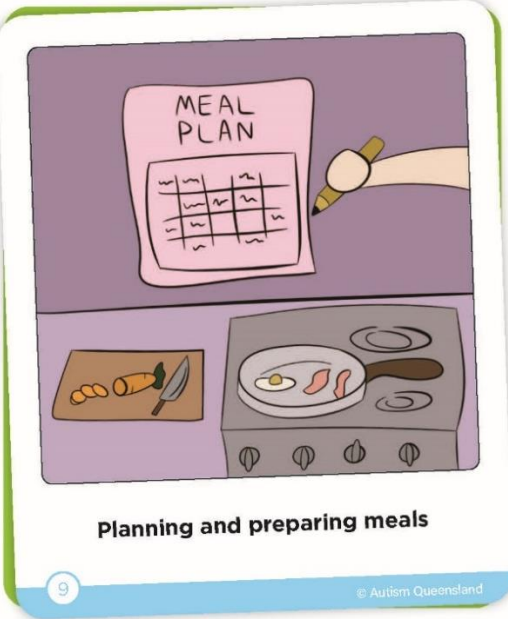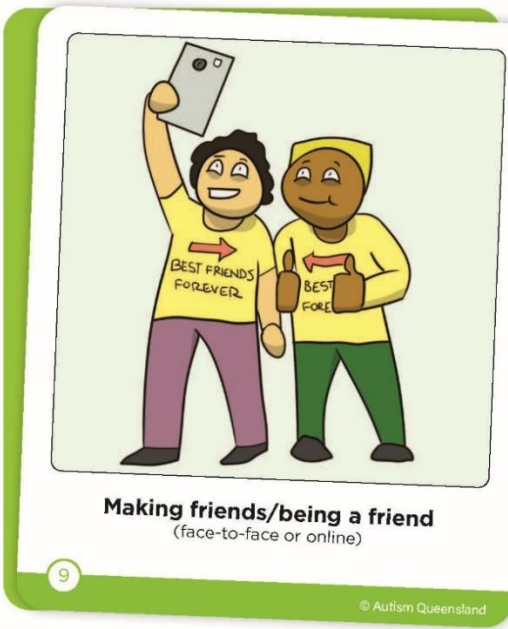

Supplement: Supp_FigS1.pdf [file Supp_FigS1.pdf]
