# Supplementary material
Source: PubMed Central journal article supplement (PMC10024266)
Supplement: Supp_FigS2.pdf [file Supp_FigS2.pdf]

Supplementary materials Figure S2

Example of completed My Goal Tracking Sheet

# My Goal Tracking Sheet



|                                                                                                                        |                                                                                                                                                                                                                                                                               |
|------------------------------------------------------------------------------------------------------------------------|-------------------------------------------------------------------------------------------------------------------------------------------------------------------------------------------------------------------------------------------------------------------------------|
| Name: <i>Paul Smith</i><br>Others attending: <i>Jessica (OT) and Simon (Support Worker)</i>                            | Interests and Strengths:<br><ul style="list-style-type: none"> <li>• <i>Love food</i></li> <li>• <i>Like watching YouTube videos to learn how to do something</i></li> <li>• <i>Creative</i></li> <li>• <i>Motivated</i></li> <li>• <i>Good at asking for help</i></li> </ul> |
| Date: <i>25/06/2020</i> <input type="checkbox"/> Initial Goal Planning <input checked="" type="checkbox"/> Goal Review |                                                                                                                                                                                                                                                                               |
| Date of next meeting: <i>30/07/2020</i>                                                                                |                                                                                                                                                                                                                                                                               |

  

| <b>Goal:</b><br><i>By the end of group I will cook meals, such as spaghetti, at home by myself</i>                                                                                                                                                                                                                     | <b>How are you going with your goal?</b><br><div style="text-align: center; margin-top: 10px;">  </div> <div style="display: flex; justify-content: space-around; font-size: small; margin-top: 5px;"> <span>I don't know how to do this/<br/>I'm not doing this</span> <span>I'm learning how to do this/<br/>I'm getting better at this</span> <span>I know how to do this/<br/>I can do this</span> </div> |                                                                                                                                                                                                                                                                                                                                                                                                                     |
|------------------------------------------------------------------------------------------------------------------------------------------------------------------------------------------------------------------------------------------------------------------------------------------------------------------------|-------------------------------------------------------------------------------------------------------------------------------------------------------------------------------------------------------------------------------------------------------------------------------------------------------------------------------------------------------------------------------------------------------------------------------------------------------------------------------------------------|---------------------------------------------------------------------------------------------------------------------------------------------------------------------------------------------------------------------------------------------------------------------------------------------------------------------------------------------------------------------------------------------------------------------|
| What's happening now?                                                                                                                                                                                                                                                                                                  | What are the steps?                                                                                                                                                                                                                                                                                                                                                                                                                                                                             | Who can help you with this? And how?                                                                                                                                                                                                                                                                                                                                                                                |
| <i>I found an easy spaghetti recipe on Google</i><br><br><i>I watched a YouTube video of someone making spaghetti</i><br><br><i>I watched a YouTube video about cooking on the stove safely and Luke showed me how to use the stove safely in group</i><br><br><i>I cooked spaghetti in group with Luke helping me</i> | <input type="checkbox"/> <i>Buy all the ingredients with Simon, my support worker</i><br><br><input type="checkbox"/> <i>Practice cooking spaghetti at home with Simon watching</i><br><br><input type="checkbox"/> <i>Practice cooking spaghetti at home while Mum is there</i><br><br><input type="checkbox"/> <i>Cook spaghetti at home by myself</i><br><br><input type="checkbox"/>                                                                                                        | <b>Who?</b> <i>Simon</i><br><b>How can they help?</b><br><ul style="list-style-type: none"> <li>• <i>Help me buy the ingredients I need - on Mondays when we go grocery shopping</i></li> <li>• <i>Watch me cook spaghetti at home</i></li> </ul> <b>Who?</b> <i>Luke (group mentor)</i><br><b>How can they help?</b><br><ul style="list-style-type: none"> <li>• <i>Watch me cook spaghetti at home</i></li> </ul> |

MASTER COPY – Photocopy before use
