# Supplementary material
Source: PubMed Central journal article supplement (PMC10024266)
Supplement: Supp_TableS1.pdf [file Supp_TableS1.pdf]

**Table S1:**

*Survey 1: Quantitative and qualitative survey results, qualitative content analysis, research team reflection and revised plan*

| ACT                                     | OBSERVE (Collect and Analyse Data) (n = 26 surveys returned)           |            |              |                                                                                           |            |              |                                                                                       |            |              | REFLECT                                                                                                                                                                             | REVISED PLAN                                                                  |                                                                                                                                                                                                                                    |                                                                                                                                                                                                                                    |
|-----------------------------------------|------------------------------------------------------------------------|------------|--------------|-------------------------------------------------------------------------------------------|------------|--------------|---------------------------------------------------------------------------------------|------------|--------------|-------------------------------------------------------------------------------------------------------------------------------------------------------------------------------------|-------------------------------------------------------------------------------|------------------------------------------------------------------------------------------------------------------------------------------------------------------------------------------------------------------------------------|------------------------------------------------------------------------------------------------------------------------------------------------------------------------------------------------------------------------------------|
| Phase 1 version of goal cards           | Quantitative data                                                      |            |              |                                                                                           |            |              | Qualitative data                                                                      |            |              | Reflections on quantitative and qualitative data                                                                                                                                    | Reasoning behind the research team decision-making                            |                                                                                                                                                                                                                                    |                                                                                                                                                                                                                                    |
| Goal card                               | <i>Is this goal likely to be important to someone on the spectrum?</i> |            |              | <i>Does the picture on this goal card help you to understand what this goal is about?</i> |            |              | <i>Do the words on this goal card help you to understand what this goal is about?</i> |            |              |                                                                                                                                                                                     |                                                                               | Responses to open-ended question:<br><i>In this category, were there any goals or pictures that you found confusing or that you think need to be changed or simplified? If yes, please let us know which goal/picture and why.</i> | Responses to open-ended question:<br><i>In this category, were there any goals or pictures that you found confusing or that you think need to be changed or simplified? If yes, please let us know which goal/picture and why.</i> |
|                                         | Yes (%)                                                                | No (%)     | Not sure (%) | Yes (%)                                                                                   | No (%)     | Not sure (%) | Yes (%)                                                                               | No (%)     | Not sure (%) |                                                                                                                                                                                     |                                                                               |                                                                                                                                                                                                                                    |                                                                                                                                                                                                                                    |
| <b>SOCIAL RELATIONSHIPS</b>             |                                                                        |            |              |                                                                                           |            |              |                                                                                       |            |              |                                                                                                                                                                                     |                                                                               |                                                                                                                                                                                                                                    |                                                                                                                                                                                                                                    |
| <b>1. Getting along with others.</b>    | 21<br>(81%)                                                            | 3<br>(11%) | 2<br>(8%)    | 14<br>(54%)                                                                               | 9<br>(35%) | 3<br>(11%)   | 20<br>(77%)                                                                           | 4<br>(15%) | 2<br>(8%)    | The "getting along with others" one looks more like "helping others" to me. The pictures for getting along with others seemed like the people were angry, which is a bit confusing. | Meaning of picture is not clear. Non-verbal behaviours do not reflect meaning | 46% responded no/not sure re picture clarity and qualitative data suggested picture and non-verbal behaviours do not reflect meaning, Picture was reviewed.                                                                        | New picture created (people sitting on the steps chatting with friendly facial expressions) to convey meaning more clearly with clearer non-verbal behaviours.                                                                     |
| <b>2. Making friends/being a friend</b> | 23<br>(88%)                                                            | 1<br>(4%)  | 2<br>(8%)    | 13<br>(50%)                                                                               | 7<br>(27%) | 6<br>(23%)   | 23<br>(92%)                                                                           | 2<br>(8%)  | 1<br>(4%)    | The faces did not look friendly, and this was distracting and confusing                                                                                                             | Meaning of picture is not clear.                                              | 50% responded no/not sure re the picture clarity, and                                                                                                                                                                              | New picture created to convey meaning more clearly with                                                                                                                                                                            |

|                                                                 |             |            |            |             |            |            |                  |                                              |                                                                                                            |                                                                                                                                                                                                                     |                                                                                  |                                                                                                                                                               |                                                                                                                                                     |
|-----------------------------------------------------------------|-------------|------------|------------|-------------|------------|------------|------------------|----------------------------------------------|------------------------------------------------------------------------------------------------------------|---------------------------------------------------------------------------------------------------------------------------------------------------------------------------------------------------------------------|----------------------------------------------------------------------------------|---------------------------------------------------------------------------------------------------------------------------------------------------------------|-----------------------------------------------------------------------------------------------------------------------------------------------------|
|                                                                 |             |            |            |             |            |            | A bit confusing. | Non-verbal behaviours do not reflect meaning | qualitative data suggested picture and non-verbal behaviours do not reflect meaning. Picture was reviewed. | clearer non-verbal behaviours (a group of friends taking a selfie).                                                                                                                                                 |                                                                                  |                                                                                                                                                               |                                                                                                                                                     |
| <b>3. Dealing with conflict</b>                                 | 22<br>(85%) | 2<br>(8%)  | 2<br>(8%)  | 13<br>(50%) | 8<br>(31%) | 5<br>(19%) | 23<br>(88%)      | 2<br>(8%)                                    | 1<br>(4%)                                                                                                  | There was no sense of resolution (of the conflict) in picture. It could show the more desired behaviour (such as 2 characters talking animatedly with open upwards palms and smiles).                               | Meaning of picture is not clear                                                  | 50% responded no/not sure re picture clarity, and qualitative data suggests picture does not reflect meaning. Picture was reviewed.                           | Picture changed to convey meaning more clearly – a second section was added to the picture to show resolution of the conflict                       |
| <b>4. Physical Affection</b>                                    | 19<br>(73%) | 3<br>(11%) | 4<br>(15%) | 19<br>(73%) | 4<br>(15%) | 3<br>(11%) | 21<br>(81%)      | 3<br>(11%)                                   | 1<br>(4%)                                                                                                  | "Physical affection" - the top half of this picture is too ambiguous, and off-putting. It might be better to use a picture that is more like the bottom picture on that card, which seems more genuine and positive | Meaning of picture is not clear.<br>Non-verbal behaviours do not reflect meaning | 26% responded no/not sure re the picture clarity, and qualitative data suggest picture and non-verbal behaviour do not reflect meaning. Picture was reviewed. | Non-verbal behaviours changed (couple kissing and smiling to indicate mutual enjoyment). Explicit cues (love hearts) added to signify love/romance. |
| <b>5. Understanding which behaviours should be kept private</b> | 23<br>(88%) | 0<br>(0%)  | 3<br>(11%) | 16<br>(64%) | 6<br>(24%) | 3<br>(12%) | 23<br>(88%)      | 3<br>(11%)                                   | 0<br>(0%)                                                                                                  | I am worried the private one seems negative, instead of telling us in a positive way that it's ok to be naked and do private things, but just encouraging that sense of privacy;                                    | Meaning of picture is not clear.                                                 | 36% responded no/not sure re the picture clarity and qualitative data suggest picture does not reflect meaning. Picture was reviewed.                         | Explicit cues added - a red "No" symbol changed to red cross and a green tick was added to the door with a private sign.                            |

|                                                         |             |            |           |             |            |            |             |            |           |                                                                                                                                                                                                          |                                                                           |                                                                                                                                                                              |                                                                                                                                                        |
|---------------------------------------------------------|-------------|------------|-----------|-------------|------------|------------|-------------|------------|-----------|----------------------------------------------------------------------------------------------------------------------------------------------------------------------------------------------------------|---------------------------------------------------------------------------|------------------------------------------------------------------------------------------------------------------------------------------------------------------------------|--------------------------------------------------------------------------------------------------------------------------------------------------------|
|                                                         |             |            |           |             |            |            |             |            |           |                                                                                                                                                                                                          |                                                                           |                                                                                                                                                                              |                                                                                                                                                        |
| <b>6. Visiting people/having someone over</b>           | 20<br>(77%) | 4<br>(15%) | 2<br>(8%) | 16<br>(62%) | 6<br>(23%) | 4<br>(15%) | 23<br>(88%) | 3<br>(11%) | 0<br>(0%) | A person walking through a door indicates walking into a room.<br>The visiting person looks like someone going home.                                                                                     | Meaning of picture is not clear.                                          | 36% responded no/not sure re the picture clarity, and qualitative data suggest picture does not reflect meaning, Picture was reviewed.                                       | Comments noted but there was no obvious way to make the picture clearer.                                                                               |
| <b>7. Hosting or attending social gatherings/events</b> | 22<br>(85%) | 3<br>(11%) | 1<br>(4%) | 19<br>(76%) | 3<br>(12%) | 3<br>(12%) | 23<br>(88%) | 2<br>(8%)  | 1<br>(4%) | Characters are awkward and uncomfortable looking.<br>Rather than suggesting that this is the correct, it might be better to display some relaxed, cheerful characters modelling the preferred behaviour. | Non-verbal behaviours do not reflect meaning                              | 24% responded no/ not sure re picture clarity, and qualitative data suggest non-verbal behaviour do not reflect meaning. Picture was reviewed.                               | Non-verbal behaviours changed so that people are facing each other and talking.                                                                        |
| <b>8. Being part of a social group or club</b>          | 21<br>(81%) | 4<br>(15%) | 1<br>(4%) | 17<br>(65%) | 4<br>(15%) | 5<br>(19%) | 25<br>(96%) | 1<br>(4%)  | 0<br>(0%) | Not a clear example of a social group. Perhaps band or sports team would be better.<br>Social Group card looks as though they are gambling.                                                              | Meaning of picture is not clear.<br>Details inappropriate or unnecessary. | 34% responded no/ not sure re picture clarity, and qualitative data suggested that picture is not clear, and details are inappropriate or unnecessary. Picture was reviewed. | Explicit cues (club T-shirts) added to enhance meaning.<br>Details changed: counters on game board added to look more like a board game than gambling. |

|                                              |             |           |            |             |            |            |             |            |           |                                                                                                                                                                 |                                                                               |                                                                                                                                                                  |                                                                                                                    |
|----------------------------------------------|-------------|-----------|------------|-------------|------------|------------|-------------|------------|-----------|-----------------------------------------------------------------------------------------------------------------------------------------------------------------|-------------------------------------------------------------------------------|------------------------------------------------------------------------------------------------------------------------------------------------------------------|--------------------------------------------------------------------------------------------------------------------|
| <b>9. Caring for others</b>                  | 21<br>(81%) | 1<br>(4%) | 4<br>(15%) | 23<br>(88%) | 0<br>(0%)  | 3<br>(12%) | 24<br>(92%) | 1<br>(4%)  | 1<br>(4%) | NIL                                                                                                                                                             | NIL                                                                           | 88% responded said picture was clear. No qualitative comments                                                                                                    | No changes                                                                                                         |
| <b>10. Dating/finding a partner</b>          | 19<br>(73%) | 1<br>(4%) | 6<br>(23%) | 16<br>(61%) | 8<br>(31%) | 2<br>(8%)  | 22<br>(85%) | 3<br>(11%) | 1<br>(4%) | I like that this covers more than just heterosexual relationships. I think the dating/finding a partner one just looks like people in a restaurant in general   | Meaning of picture is not clear.                                              | 39% responded no/ not sure re picture clarity, and qualitative data suggested that picture is not clear. Picture was reviewed.                                   | Explicit cues (love hearts) were added to make meaning clearer                                                     |
| <b>11. Being in a long-term relationship</b> | 21<br>(81%) | 1<br>(4%) | 4<br>(15%) | 18<br>(69%) | 6<br>(23%) | 2<br>(8%)  | 22<br>(85%) | 3<br>(11%) | 1<br>(4%) | What do people holding hand have to do with long term relationships? - looks like a holiday. Suggest cooking, cleaning and taking out the garbage together..... | Meaning of picture is not clear. Non-verbal behaviours do not reflect meaning | As 31% responded no/ not sure re picture clarity, and qualitative data suggested picture and non-verbal behaviours do not reflect meaning. Picture was reviewed. | Non-verbal behaviours altered to demonstrate more affection (cooking, cleaning etc. may suggest a different goal). |
| <b>12. Becoming a parent</b>                 | 17<br>(65%) | 1<br>(4%) | 8<br>(31%) | 22<br>(85%) | 2<br>(8%)  | 2<br>(8%)  | 21<br>(81%) | 3<br>(11%) | 1<br>(8%) | Becoming a parent seems to be congratulating. Suggest holding a newborn together.                                                                               | Non-verbal behaviours do not reflect meaning                                  | 85% said the picture was clear, but qualitative data suggest that non-verbal behaviours do not reflect meaning. Picture was reviewed.                            | The non-verbal behaviours were perceived to be appropriate (smiles on parent's faces.)                             |
| <b>13. Being a good parent</b>               | 22<br>(85%) | 2<br>(8%) | 2<br>(8%)  | 23<br>(88%) | 2<br>(8%)  | 1<br>(4%)  | 22<br>(85%) | 2<br>(8%)  | 2<br>(8%) | Confusing – Afro-Caribbean parents with Asian children. Pushing a pram does not signify being a good parent.                                                    | Meaning of picture is not clear. Details inappropriate or unnecessary.        | 88% said the picture was clear, but                                                                                                                              | Explicit cue (No.1 Dad label) put on shirt to make more obvious.                                                   |

|                                |             |           |            |             |           |            |             |            |           |                                                                                                                                                                                                            | Qualitative data suggested that picture is not clear, and some details are inappropriate. Picture was reviewed. | Details changed: Mismatched ethnicity of parents and child corrected - children's eyes changed to appear less Asian.                                                                                                                                               |                                                                                                                                                                                                                                                                  |
|--------------------------------|-------------|-----------|------------|-------------|-----------|------------|-------------|------------|-----------|------------------------------------------------------------------------------------------------------------------------------------------------------------------------------------------------------------|-----------------------------------------------------------------------------------------------------------------|--------------------------------------------------------------------------------------------------------------------------------------------------------------------------------------------------------------------------------------------------------------------|------------------------------------------------------------------------------------------------------------------------------------------------------------------------------------------------------------------------------------------------------------------|
| SELF-CARE AND HOME LIVING      |             |           |            |             |           |            |             |            |           |                                                                                                                                                                                                            |                                                                                                                 |                                                                                                                                                                                                                                                                    |                                                                                                                                                                                                                                                                  |
| <b>14. Eating and drinking</b> | 22<br>(88%) | 1<br>(4%) | 2<br>(8%)  | 22<br>(85%) | 1<br>(4%) | 3<br>(12%) | 22<br>(85%) | 3<br>(11%) | 1<br>(4%) | May apply to everyone - not just autistic people; The girl should have some green vegies on her plate, and not look sick.<br>Is it about obtaining or preparing food/drink?<br>Process of eating/drinking? | Non-verbal behaviours do not reflect meaning. Details inappropriate or unnecessary.                             | 85% said the picture was clear and 88% said card is important (many autistic people have restricted eating habits). Qualitative data suggested that non-verbal behaviours do not reflect meaning, and some details are inappropriate. Picture and wording reviewed | Non-verbal behaviours altered (girl's eyes open, looking at plate). Details changed: (colour in cheeks to indicate good health, vegetables added). Words added to indicate the type of goals that may be relevant (e.g., eating a range of foods, using cutlery) |
| <b>15. Using the toilet</b>    | 24<br>(83%) | 2<br>(7%) | 3<br>(10%) | 24<br>(92%) | 1<br>(4%) | 1<br>(4%)  | 24<br>(92%) | 1<br>(4%)  | 1<br>(4%) | Applies to everyone - not just autistic people                                                                                                                                                             | Goals apply to everyone - not just autistic people                                                              | 83% indicated that this goal is important. Qualitative comments suggest goals apply to everyone, not just autistic people. Goal was reviewed.                                                                                                                      | No changes were made, as this goal may be important to some people.                                                                                                                                                                                              |

|                                                 |                                      |                                       |                                     |                                                                                                                                                                                                                                                                        |                                                                                                          |                                                                                                                                                                                                                                      |                                                                                                                                                                                    |
|-------------------------------------------------|--------------------------------------|---------------------------------------|-------------------------------------|------------------------------------------------------------------------------------------------------------------------------------------------------------------------------------------------------------------------------------------------------------------------|----------------------------------------------------------------------------------------------------------|--------------------------------------------------------------------------------------------------------------------------------------------------------------------------------------------------------------------------------------|------------------------------------------------------------------------------------------------------------------------------------------------------------------------------------|
| <p><b>16. Sleeping</b></p>                      | <p>22 (85%)    1 (4%)    3 (11%)</p> | <p>21 (81%)    3 (12%)    2 (8%)</p>  | <p>23 (88%)    2 (8%)    1 (4%)</p> | <p>The sleeping person looks like they have collapsed with exhaustion, which is a common reality of being young and on the spectrum, but not good sleep hygiene. Person should be sleeping comfortably, not collapsed into bed so quickly they dropped their book.</p> | <p>Non-verbal behaviours do not reflect meaning. Details inappropriate, or unnecessary.</p>              | <p>81% said the picture was clear, but qualitative data suggested non-verbal behaviours do not reflect meaning and details are unnecessary. Picture was reviewed.</p>                                                                | <p>Non-verbal behaviours altered (face changed to look more relaxed). Details changed: Items on floor removed as they were inessential.</p>                                        |
| <p><b>17. Dressing myself appropriately</b></p> | <p>23 (92%)    0 (0%)    2 (8%)</p>  | <p>20 (77%)    3 (12%)    3 (12%)</p> | <p>24 (92%)    1 (4%)    1 (4%)</p> | <p>NIL</p>                                                                                                                                                                                                                                                             | <p>NIL</p>                                                                                               | <p>92% indicated that the goal is important and 77% indicated that the picture was helpful. No qualitative comments.</p>                                                                                                             | <p>No changes were made.</p>                                                                                                                                                       |
| <p><b>18. Grooming</b></p>                      | <p>21 (84%)    2 (8%)    2 (8%)</p>  | <p>23 (88%)    2 (8%)    1 (4%)</p>   | <p>23 (88%)    2 (8%)    1 (4%)</p> | <p>Applies to everyone - not just autistic people; female character looks worried, nervous?<br/>Wrong facial expression for an activity that we are trying to encourage.</p>                                                                                           | <p>Goals apply to everyone - not just autistic people. Non-verbal behaviours do not reflect meaning.</p> | <p>84% indicated that this goal is important 88% said picture was clear. Qualitative data suggest goals apply to everyone, not just autistic people, and non-verbal behaviours do not reflect meaning Goal and picture reviewed.</p> | <p>No changes were made. Non-verbal behaviours not changed (female's mouth posture related to teeth cleaning activity rather than mood). Goal may be important to some people.</p> |

|                                               |             |            |            |             |            |            |             |           |            |                                                                                                                                                                                                                                                                                                   |                                                                                         |                                                                                                                                                                                                  |                                                                                                                                         |
|-----------------------------------------------|-------------|------------|------------|-------------|------------|------------|-------------|-----------|------------|---------------------------------------------------------------------------------------------------------------------------------------------------------------------------------------------------------------------------------------------------------------------------------------------------|-----------------------------------------------------------------------------------------|--------------------------------------------------------------------------------------------------------------------------------------------------------------------------------------------------|-----------------------------------------------------------------------------------------------------------------------------------------|
| <b>19. Understanding and managing periods</b> | 16<br>(62%) | 2<br>(8%)  | 7<br>(28%) | 19<br>(73%) | 2<br>(8%)  | 5<br>(19%) | 19<br>(73%) | 1<br>(4%) | 6<br>(23%) | A lot of autistic women and trans people don't like girly stuff and might really hate menstruating. Background other than pink would be good because it would take away from the femininity and just make it another reality of self-care. Young men may not be familiar with particular methods. | Details inappropriate, or unnecessary. Some participants may not be familiar with goal. | 17% responded no/ not sure re picture clarity. Qualitative data suggest some details of picture are inappropriate, and some participants not familiar with goal. Goal and picture were reviewed. | No obvious way to enhance clarity of picture. Details changed: background changed from pink to blue.                                    |
| <b>20. Planning and preparing meals</b>       | 24<br>(92%) | 1<br>(4%)  | 1<br>(4%)  | 22<br>(85%) | 4<br>(15%) | 0<br>(0%)  | 23<br>(88%) | 2<br>(8%) | 1<br>(4%)  | What are the little boxes? Having the word 'meal plan' and a calendar makes the card look like it is about 'schedules' rather than cooking.                                                                                                                                                       | Meaning of picture is not clear.                                                        | 15% responded no/ not sure re picture clarity, and qualitative data suggested that picture is not clear. Picture was reviewed.                                                                   | New picture created to convey meaning more clearly (picture was made into a single kitchen scene with frypan, cutting board and knife). |
| <b>21. Doing house chores</b>                 | 23<br>(88%) | 2<br>(8%)  | 1<br>(4%)  | 25<br>(96%) | 0<br>(0%)  | 1<br>(4%)  | 24<br>(92%) | 1<br>(4%) | 1<br>(4%)  | NIL                                                                                                                                                                                                                                                                                               | NIL                                                                                     | 96% said picture was clear. No qualitative comments.                                                                                                                                             | No changes were made.                                                                                                                   |
| <b>22. Caring for pets</b>                    | 23<br>(92%) | 0<br>(0%)  | 2<br>(8%)  | 25<br>(96%) | 1<br>(4%)  | 0<br>(0%)  | 25<br>(96%) | 0<br>(0%) | 1<br>(4%)  | NIL                                                                                                                                                                                                                                                                                               | NIL                                                                                     | 96% said picture was clear. No qualitative comments.                                                                                                                                             | No changes were made.                                                                                                                   |
| <b>23. Moving out of home</b>                 | 20<br>(77%) | 3<br>(11%) | 3<br>(11%) | 22<br>(85%) | 3<br>(12%) | 1<br>(4%)  | 25<br>(96%) | 1<br>(4%) | 0<br>(0%)  | NIL                                                                                                                                                                                                                                                                                               | NIL                                                                                     | 96% said picture was clear. No qualitative comments.                                                                                                                                             | No changes were made.                                                                                                                   |
| <b>STUDY AND TRAINING</b>                     |             |            |            |             |            |            |             |           |            |                                                                                                                                                                                                                                                                                                   |                                                                                         |                                                                                                                                                                                                  |                                                                                                                                         |
| <b>24. Getting better at reading</b>          | 19<br>(79%) | 1<br>(4%)  | 4<br>(16%) | 22<br>(92%) | 1<br>(4%)  | 1<br>(4%)  | 22<br>(92%) | 2<br>(8%) | 0<br>(0%)  | It is not clear that there is a goal for improvement; I                                                                                                                                                                                                                                           | Goals not relevant to some people.                                                      | 79% said goal was important.                                                                                                                                                                     | No changes were made (reading                                                                                                           |

|                                      |             |           |            |             |            |                                                                                                                                                                                                                                                                                                                                                                                                                                                                            |             |                                                                                                |                                                                                       |                                                                                                                                                                                                                                                                                                                          |                                                         |                                                                                                                                  |                                                                                                                                                                                 |
|--------------------------------------|-------------|-----------|------------|-------------|------------|----------------------------------------------------------------------------------------------------------------------------------------------------------------------------------------------------------------------------------------------------------------------------------------------------------------------------------------------------------------------------------------------------------------------------------------------------------------------------|-------------|------------------------------------------------------------------------------------------------|---------------------------------------------------------------------------------------|--------------------------------------------------------------------------------------------------------------------------------------------------------------------------------------------------------------------------------------------------------------------------------------------------------------------------|---------------------------------------------------------|----------------------------------------------------------------------------------------------------------------------------------|---------------------------------------------------------------------------------------------------------------------------------------------------------------------------------|
|                                      |             |           |            |             |            | really like the "getting better at reading" one, because the lizard looks cool, and it's not obvious what reading level that book would be at.<br>It would still be appealing for my friends who have significant literacy issues and find the idea a bit intimidating.<br>Is "getting better at reading" starting with a level of illiteracy and learning to read, or developing better reading skills to complete study, or some generic improvement of existing skills. |             | Qualitative data suggest goals apply to everyone, not just autistic people. Goal was reviewed. | improvements in reading may be important for people with a range of literacy levels). |                                                                                                                                                                                                                                                                                                                          |                                                         |                                                                                                                                  |                                                                                                                                                                                 |
| <b>25. Getting better at writing</b> | 18<br>(75%) | 2<br>(8%) | 4<br>(16%) | 20<br>(83%) | 3<br>(12%) | 1<br>(4%)                                                                                                                                                                                                                                                                                                                                                                                                                                                                  | 22<br>(92%) | 1<br>(4%)                                                                                      | 1<br>(4%)                                                                             | The second goal card could be about getting better at handwriting legibility or conveying a message across through writing                                                                                                                                                                                               | Goals may have different meanings for different people. | 75% said goal was important. Qualitative data suggest goals may have different meanings for different people. Goal was reviewed. | No changes were made. Improving writing may be important for people with a range of writing challenges.                                                                         |
| <b>26. Getting better at maths</b>   | 18<br>(75%) | 1<br>(4%) | 5<br>(21%) | 20<br>(83%) | 3<br>(12%) | 1<br>(4%)                                                                                                                                                                                                                                                                                                                                                                                                                                                                  | 21<br>(87%) | 1<br>(4%)                                                                                      | 2<br>(8%)                                                                             | I passed my accounting course at university, and I still have major maths anxiety. I didn't find it appealing or interesting, because I stress about numbers. I am totally interested in being better at my banking, or my grocery budget, or lots of other ways I use maths in the real world. Maybe there is a way you | Goals may have different meanings for different people. | 75% said goal was important. Qualitative data suggest goals may have different meanings for different people. Goal was reviewed. | Improving mathematics may be important for people with a range of mathematical challenges. Picture simplified to reduce clutter - adding other pictures may increase confusion. |



|                                                                 |             |           |            |             |           |            |             |           |                                            |                                                                                                                                                                                                                                                                          |                                                                        |                                                                                                                                                                   |                                                                                                                                                                                                                                                                                                                                                                                                                                                 |
|-----------------------------------------------------------------|-------------|-----------|------------|-------------|-----------|------------|-------------|-----------|--------------------------------------------|--------------------------------------------------------------------------------------------------------------------------------------------------------------------------------------------------------------------------------------------------------------------------|------------------------------------------------------------------------|-------------------------------------------------------------------------------------------------------------------------------------------------------------------|-------------------------------------------------------------------------------------------------------------------------------------------------------------------------------------------------------------------------------------------------------------------------------------------------------------------------------------------------------------------------------------------------------------------------------------------------|
|                                                                 |             |           |            |             |           |            |             |           | could incorporate real world use of maths? |                                                                                                                                                                                                                                                                          |                                                                        |                                                                                                                                                                   |                                                                                                                                                                                                                                                                                                                                                                                                                                                 |
| <b>27. Developing computer, iPad/tablet and internet skills</b> | 21<br>(88%) | 0<br>(0%) | 3<br>(13%) | 22<br>(92%) | 1<br>(4%) | 1<br>(4%)  | 22<br>(92%) | 2<br>(8%) | 0<br>(0%)                                  | it is not clear that there is a goal for improvement.                                                                                                                                                                                                                    | Meaning of picture is not clear.                                       | 88% said goal was important.<br>92% said the picture was clear. Qualitative data suggested that picture is not clear. Picture was reviewed                        | No changes were made, as there was no obvious way to enhance meaning.                                                                                                                                                                                                                                                                                                                                                                           |
| <b>28. Planning and completing assignments on time</b>          | 20<br>(83%) | 2<br>(8%) | 2<br>(8%)  | 18<br>(75%) | 1<br>(4%) | 5<br>(21%) | 21<br>(87%) | 1<br>(4%) | 2<br>(8%)                                  | The locked letterbox is confusing. Most people don't submit assignments this way. Details are important to ASD individuals, and when aspects of the cards/pictures are incongruous or confusing, they will get 'bogged down' working out what is wrong with the picture. | Meaning of picture is not clear. Details inappropriate or unnecessary. | 25% said no /not sure re picture clarity. Qualitative data suggests that meaning of picture is not clear and that details are inappropriate. Picture was reviewed | The picture was changed to convey meaning more clearly. Wording was changed to broaden goal to include exams (" <i>Doing exams and assignments (e.g., getting study/assignments done on time)</i> "). Picture changed from a hard-copy assignment being placed into a locked box to a split picture with computer screen in top picture with <i>Assignment due date</i> and a <i>submit</i> button. The bottom picture conveyed an "Exam paper. |

|                                                                                          |             |            |           |             |            |            |             |            |            |                                                                                                                   |                                       |                                                                                                                             |                                                                                                                                                                                                                                          |
|------------------------------------------------------------------------------------------|-------------|------------|-----------|-------------|------------|------------|-------------|------------|------------|-------------------------------------------------------------------------------------------------------------------|---------------------------------------|-----------------------------------------------------------------------------------------------------------------------------|------------------------------------------------------------------------------------------------------------------------------------------------------------------------------------------------------------------------------------------|
| <b>29. Choosing and applying for a course to suit my interests/understanding choices</b> | 23<br>(96%) | 1<br>(4%)  | 0<br>(0%) | 19<br>(79%) | 2<br>(8%)  | 3<br>(12%) | 20<br>(83%) | 1<br>(4%)  | 3<br>(13%) | NIL                                                                                                               | NIL                                   | 79% said the picture was clear. No qualitative comments                                                                     | No changes were made.                                                                                                                                                                                                                    |
| <b>30. Attending classes face to face or virtually</b>                                   | 18<br>(75%) | 4<br>(16%) | 2<br>(8%) | 19<br>(79%) | 5<br>(21%) | 0<br>(0%)  | 20<br>(83%) | 3<br>(13%) | 1<br>(4%)  | It could have a teacher perspective of marking the roll and ticking off names to show it is good to attend class; | Alternative picture suggested.        | 21% said no or not sure re the clarity of the picture. Qualitative data suggests alternative picture. Picture was reviewed. | Alternative picture suggestion considered but not used because roll-marking does not typically occur in tertiary education settings. Inessential details (e.g., window) removed, to improve clarity of picture.                          |
| <b>31. Working/studying in a group</b>                                                   | 17<br>(71%) | 5<br>(21%) | 2<br>(8%) | 18<br>(75%) | 3<br>(12%) | 3<br>(12%) | 21<br>(87%) | 2<br>(8%)  | 1<br>(4%)  | NIL                                                                                                               | NIL                                   | 71% said goal was important and 75% said picture was clear. No qualitative comments.                                        | No changes made                                                                                                                                                                                                                          |
| <b>EMPLOYMENT</b>                                                                        |             |            |           |             |            |            |             |            |            |                                                                                                                   |                                       |                                                                                                                             |                                                                                                                                                                                                                                          |
| <b>32. Finding a job</b>                                                                 | 23<br>(96%) | 1<br>(4%)  | 0<br>(0%) | 20<br>(83%) | 2<br>(8%)  | 2<br>(8%)  | 23<br>(96%) | 1<br>(4%)  | 0<br>(0%)  | Gender role stereotyping?                                                                                         | Details inappropriate or unnecessary. | 83% said the picture was clear. Qualitative data suggested inappropriate details. Picture was reviewed.                     | As the job descriptions of employees depicted in picture are open to interpretation (e.g., person sitting behind a computer could be an administration assistant or a company executive), a decision was made not to change the picture. |

|                                               |              |           |           |             |            |            |             |            |           |                                                                                                                                       |                                  |                                                                                                                    |                                                                                                                                                                                                                                                                                                                           |
|-----------------------------------------------|--------------|-----------|-----------|-------------|------------|------------|-------------|------------|-----------|---------------------------------------------------------------------------------------------------------------------------------------|----------------------------------|--------------------------------------------------------------------------------------------------------------------|---------------------------------------------------------------------------------------------------------------------------------------------------------------------------------------------------------------------------------------------------------------------------------------------------------------------------|
| <b>33. Applying for a job</b>                 | 22<br>(92%)  | 1<br>(4%) | 1<br>(4%) | 18<br>(75%) | 3<br>(12%) | 3<br>(12%) | 21<br>(87%) | 2<br>(8%)  | 1<br>(4%) | Due to us generally being very literal, we may get confused by the meaning of a computer screen with Apply Now featured on it.        | Meaning of picture is not clear. | 75% said the picture was clear. Qualitative data suggested meaning of picture is not clear. Picture was reviewed.  | No changes were made, as there were no obvious ways to make the picture clearer.                                                                                                                                                                                                                                          |
| <b>34. Going for a job interview</b>          | 22<br>(92%)  | 1<br>(4%) | 1<br>(4%) | 19<br>(79%) | 3<br>(12%) | 2<br>(8%)  | 19<br>(79%) | 3<br>(13%) | 2<br>(8%) | NIL                                                                                                                                   | NIL                              | 83% said the picture was clear. No qualitative comments.                                                           | No changes made                                                                                                                                                                                                                                                                                                           |
| <b>35. Managing time/getting my work done</b> | 24<br>(100%) | 0<br>(0%) | 0<br>(0%) | 21<br>(88%) | 2<br>(8%)  | 1<br>(4%)  | 22<br>(92%) | 1<br>(4%)  | 1<br>(4%) | It looks like being able to remember the date and time; I'd make a close-up of a to do list and what times they needed to be done by. | Meaning of picture is not clear. | 88% said the picture was clear. Qualitative data suggested meaning of picture is not clear. Picture was reviewed.  | Concerns that adding details of the to-do list would increase the complexity of the card. No change was made.                                                                                                                                                                                                             |
| <b>36. Getting along with co-workers</b>      | 22<br>(92%)  | 1<br>(4%) | 1<br>(4%) | 16<br>(67%) | 3<br>(12%) | 3<br>(12%) | 20<br>(83%) | 3<br>(13%) | 1<br>(4%) | Getting along with co-workers looks like a coffee break; OK but what about a pat on the back on the job with a smile all round.       | Alternative picture suggested.   | 75% said the picture was clear. Qualitative data included suggestion of alternative picture. Picture was reviewed. | Re alternative picture suggestion – concern that this would overlap with “Meeting requirements of the job” card in which the boss is giving the worker a thumbs-up sign. Picture in “Getting along with co-workers” card could represent a workplace meeting (includes document on the table) rather than a coffee break. |
| <b>37. Meeting requirements of the job</b>    | 21<br>(88%)  | 2<br>(8%) | 1<br>(4%) | 18<br>(75%) | 5<br>(21%) | 1<br>(4%)  | 20<br>(87%) | 2<br>(9%)  | 1<br>(4%) | NIL                                                                                                                                   | NIL                              | 75% said the picture was clear.                                                                                    | No changes were made                                                                                                                                                                                                                                                                                                      |

|                                                      |             |           |            |             |            |            |             |           |            |                                                                                                                       |                                                                        | No qualitative comments.                                                                                                                                 |                                                                                                                                                                             |
|------------------------------------------------------|-------------|-----------|------------|-------------|------------|------------|-------------|-----------|------------|-----------------------------------------------------------------------------------------------------------------------|------------------------------------------------------------------------|----------------------------------------------------------------------------------------------------------------------------------------------------------|-----------------------------------------------------------------------------------------------------------------------------------------------------------------------------|
| HEALTH & FITNESS                                     |             |           |            |             |            |            |             |           |            |                                                                                                                       |                                                                        |                                                                                                                                                          |                                                                                                                                                                             |
| <b>38. Keeping fit and healthy</b>                   | 22<br>(92%) | 1<br>(4%) | 1<br>(4%)  | 23<br>(96%) | 0<br>(0%)  | 1 (4%)     | 23<br>(96%) | 1<br>(4%) | 0<br>(0%)  | Diet and exercise and maintaining health are very different things                                                    | Meaning of picture is not clear.                                       | 96% said the picture was clear, but qualitative data suggested meaning of picture is not clear. Picture was reviewed.                                    | As diet and exercise considered to be the most important contributors to good health, there were no obvious ways to make to make the picture clearer. No changes were made. |
| <b>39. Managing medication</b>                       | 21<br>(88%) | 1<br>(4%) | 2<br>(8%)  | 19<br>(79%) | 2<br>(8%)  | 3<br>(12%) | 23<br>(96%) | 1<br>(4%) | 0<br>(0%)  | Picture looks like a tin of mushy peas! Not clear. And what is supposed to be in the glass?                           | Meaning of picture is not clear.                                       | 75% said the picture was clear, but qualitative data suggested meaning of picture is not clear. Picture was reviewed.                                    | To make the picture clearer, the pills were made more distinct and the glass with a dissolving pill was removed.                                                            |
| <b>40. Making and attending medical appointments</b> | 21<br>(88%) | 1<br>(4%) | 2<br>(8%)  | 18<br>(75%) | 3<br>(12%) | 3<br>(12%) | 21<br>(87%) | 2<br>(8%) | 1<br>(4%)  | Monster needle and head band???? How about caring consultation, taking blood pressure or temperature, writing script. | Meaning of picture is not clear. Details inappropriate or unnecessary. | 75% said the picture was clear, but qualitative data suggested meaning of picture is not clear and includes inappropriate details. Picture was reviewed. | To make the picture clearer, the picture was cropped so that poster with needle is less obvious, and doctor drawn with a stethoscope instead of a head light.               |
| <b>41. Contraception</b>                             | 19<br>(79%) | 1<br>(4%) | 4<br>(16%) | 18<br>(75%) | 3<br>(12%) | 3<br>(12%) | 19<br>(79%) | 2<br>(8%) | 3<br>(13%) | My mother had to explain contraception                                                                                | Wording not clear.                                                     | 79% said wording was clear.                                                                                                                              | The wording was changed from                                                                                                                                                |

|                                                   |             |           |           |             |            |            |             |            |           |                                                                                                                                    |                                                                         |                                                                                                                       |                                                                                                                   |
|---------------------------------------------------|-------------|-----------|-----------|-------------|------------|------------|-------------|------------|-----------|------------------------------------------------------------------------------------------------------------------------------------|-------------------------------------------------------------------------|-----------------------------------------------------------------------------------------------------------------------|-------------------------------------------------------------------------------------------------------------------|
|                                                   |             |           |           |             |            |            |             |            |           |                                                                                                                                    | Qualitative data suggested wording was not clear. Wording was reviewed. | <i>Contraception (choosing and using) to Birth control/safe sex (e.g., avoiding disease and unwanted pregnancy)</i>   |                                                                                                                   |
| <b>COMMUNITY ACCESS AND PARTICIPATION</b>         |             |           |           |             |            |            |             |            |           |                                                                                                                                    |                                                                         |                                                                                                                       |                                                                                                                   |
| <b>42. Using public facilities</b>                | 23<br>(96%) | 1<br>(4%) | 0<br>(0%) | 18<br>(75%) | 5<br>(21%) | 1 (4%)     | 21<br>(87%) | 3<br>(13%) | 0<br>(0%) | Bottom two images are unclear (pool and stadium?); doesn't really show the use of public facilities it just shows that they exist; | Meaning of picture is not clear.                                        | 75% said the picture was clear, but qualitative data suggested meaning of picture is not clear. Picture was reviewed. | Changes were made to make the picture clearer (added ladder and diving board to pool, sports field made greener). |
| <b>43. Shopping</b>                               | 22<br>(92%) | 1<br>(4%) | 1<br>(4%) | 20<br>(83%) | 1<br>(4%)  | 3<br>(12%) | 22<br>(92%) | 1<br>(4%)  | 1<br>(4%) | Didn't make sense to me.                                                                                                           | Meaning of picture is not clear.                                        | 83% said the picture was clear, but qualitative data suggested meaning of picture is not clear.                       | No changes were made, as there were no obvious ways to make the picture clearer.                                  |
| <b>44. Using public transport/catching taxis</b>  | 22<br>(92%) | 1<br>(4%) | 1<br>(4%) | 21<br>(88%) | 3<br>(12%) | 0 (0%)     | 21<br>(87%) | 1<br>(4%)  | 2<br>(8%) | Looks like two parts of one.                                                                                                       | Meaning of picture is not clear.                                        | 88% said the picture was clear, but qualitative data suggested meaning of picture is not clear. Picture was reviewed. | No changes were made, as there were no obvious ways to make the picture clearer.                                  |
| <b>45. Planning journeys/how to get somewhere</b> | 23<br>(96%) | 0<br>(0%) | 1<br>(4%) | 20<br>(83%) | 3<br>(12%) | 1 (4%)     | 19<br>(83%) | 3<br>(13%) | 1<br>(4%) | I use maps on my phone but as a symbol, I think that card is still understandable                                                  | Meaning of picture is not clear.                                        | 88% said the picture was clear, but qualitative data                                                                  | No changes were made, as there were no obvious ways to make the picture clearer.                                  |

|                                                                         |             |            |            |             |            |            |             |            |           |                                                                                                              |                                       |                                                                                                                       |                                                                                               |
|-------------------------------------------------------------------------|-------------|------------|------------|-------------|------------|------------|-------------|------------|-----------|--------------------------------------------------------------------------------------------------------------|---------------------------------------|-----------------------------------------------------------------------------------------------------------------------|-----------------------------------------------------------------------------------------------|
|                                                                         |             |            |            |             |            |            |             |            |           |                                                                                                              |                                       | suggested meaning of picture is not clear. Picture was reviewed.                                                      |                                                                                               |
| <b>46. Getting licence/driving a car</b>                                | 17<br>(71%) | 3<br>(13%) | 4<br>(16%) | 20<br>(83%) | 2<br>(8%)  | 2 (8%)     | 21<br>(87%) | 1<br>(4%)  | 2<br>(8%) | I thought it was about going through a visa check point.                                                     | Meaning of picture is not clear.      | 83% said the picture was clear, but qualitative data suggested meaning of picture is not clear. Picture was reviewed. | No changes were made, as there were no obvious ways to make the picture clearer.              |
| <b>47. Buying and maintaining a car</b>                                 | 17<br>(71%) | 4<br>(16%) | 3<br>(13%) | 20<br>(83%) | 2<br>(8%)  | 2 (8%)     | 19<br>(79%) | 3<br>(13%) | 2<br>(8%) | The man in the top part looks naked! He needs a colour on his top. Also, scary stereotype of a car salesman. | Details inappropriate or unnecessary. | 83% said the picture was clear, but qualitative data suggested inappropriate details. Picture was reviewed.           | The picture was changed to give the man with the car a coloured shirt.                        |
| <b>48. Volunteering</b>                                                 | 21<br>(88%) | 2<br>(8%)  | 1<br>(4%)  | 21<br>(88%) | 3<br>(12%) | 0 (0%)     | 22<br>(92%) | 1<br>(4%)  | 1<br>(4%) | NIL                                                                                                          | NIL                                   | 83% said the picture was clear. No qualitative comments.                                                              | No changes made                                                                               |
| <b>49. Going on holidays/travelling</b>                                 | 22<br>(92%) | 1<br>(4%)  | 1<br>(4%)  | 21<br>(88%) | 1<br>(4%)  | 2 (8%)     | 22<br>(92%) | 1<br>(4%)  | 1<br>(4%) | NIL                                                                                                          | NIL                                   | 88% said the picture was clear. No qualitative comments.                                                              | The picture was changed to that the plane's direction was more horizontal (e.g., taking off). |
| <b>COMMUNICATION</b>                                                    |             |            |            |             |            |            |             |            |           |                                                                                                              |                                       |                                                                                                                       |                                                                                               |
| <b>50. Letting others know my needs/feelings/what's important to me</b> | 23<br>(96%) | 0<br>(0%)  | 1<br>(4%)  | 16<br>(67%) | 3<br>(12%) | 3<br>(12%) | 20<br>(83%) | 3<br>(13%) | 1<br>(4%) | NIL                                                                                                          | NIL                                   | 72% said the picture was clear. No qualitative comments.                                                              | No changes were made.                                                                         |

|                                                     |             |           |           |             |            |        |             |            |            |                                                                                                                                                                                                                                                                                 |                                         |                                                                                                                                                   |                                                                                                                                                                                                |
|-----------------------------------------------------|-------------|-----------|-----------|-------------|------------|--------|-------------|------------|------------|---------------------------------------------------------------------------------------------------------------------------------------------------------------------------------------------------------------------------------------------------------------------------------|-----------------------------------------|---------------------------------------------------------------------------------------------------------------------------------------------------|------------------------------------------------------------------------------------------------------------------------------------------------------------------------------------------------|
| <b>51. Understanding others/follow instructions</b> | 23<br>(96%) | 0<br>(0%) | 1<br>(4%) | 15<br>(63%) | 8<br>(33%) | 1 (4%) | 19<br>(79%) | 2<br>(8%)  | 3<br>(13%) | <p>Not very clear on what it depicts - seems to be about gossiping or eavesdropping.</p>                                                                                                                                                                                        | <p>Meaning of picture is not clear.</p> | <p>37% said no/not sure regarding picture clarity, and qualitative data suggested meaning of picture is not clear. Picture was reviewed.</p>      | <p>Changes made to improve picture clarity included defining the arrow between the people to make it easier to see and making the people same scale and facing each other.</p>                 |
| <b>52. Asking for/accepting help</b>                | 23<br>(96%) | 1<br>(4%) | 0<br>(0%) | 16<br>(67%) | 6<br>(25%) | 2 (8%) | 20<br>(83%) | 3<br>(13%) | 1<br>(4%)  | <p>I thought it was about getting touched; Seems to be about conflict or making mistakes</p>                                                                                                                                                                                    | <p>Meaning of picture is not clear.</p> | <p>37% said no/not sure with regard to picture clarity, and qualitative data suggested meaning of picture is not clear. Picture was reviewed.</p> | <p>New picture provided to improve clarity - shows one person carrying a large number of books asking another person to help by opening the door. A speech bubble "help please" was added.</p> |
| <b>53. Using non-verbal communication</b>           | 21<br>(88%) | 1<br>(4%) | 2<br>(8%) | 19<br>(79%) | 3<br>(12%) | 1 (4%) | 19<br>(83%) | 2<br>(9%)  | 2<br>(9%)  | <p>It shows the idea of eye contact, but 'non-verbal communication' makes no sense to me; It looks like it is all about eye contact. Eye contact is really hard, and it's only one part of non-verbal communication. Maybe there is another way this could be communicated?</p> | <p>Meaning of picture is not clear.</p> | <p>83% said the picture was clear, but qualitative data suggested meaning of picture is not clear. Picture was reviewed.</p>                      | <p>No changes were made, as picture shows hand gestures (handshake) and facial expressions, as well as eye contact. There was no apparent way to make the picture clearer.</p>                 |
| <b>54. Starting conversations/greeting people</b>   | 21<br>(88%) | 2<br>(8%) | 1<br>(4%) | 13<br>(54%) | 9<br>(38%) | 2 (8%) | 20<br>(83%) | 3<br>(13%) | 1<br>(4%)  | <p>The "starting conversations" person should have another person in frame.</p>                                                                                                                                                                                                 | <p>Meaning of picture is not clear.</p> | <p>46% said no/not sure regarding picture clarity, and qualitative data suggested meaning of picture</p>                                          | <p>Picture was changed to improve clarity – shows second person waving back and a speech bubble saying "Hi".</p>                                                                               |

|                                                                      |             |            |            |             |            |           |             |           |           |                                                                                                                                                                                                                                                                                  |                                               |                                                                                                                                                   |                                                                                                                                                                                                                                                               |
|----------------------------------------------------------------------|-------------|------------|------------|-------------|------------|-----------|-------------|-----------|-----------|----------------------------------------------------------------------------------------------------------------------------------------------------------------------------------------------------------------------------------------------------------------------------------|-----------------------------------------------|---------------------------------------------------------------------------------------------------------------------------------------------------|---------------------------------------------------------------------------------------------------------------------------------------------------------------------------------------------------------------------------------------------------------------|
|                                                                      |             |            |            |             |            |           |             |           |           |                                                                                                                                                                                                                                                                                  |                                               | is not clear. Picture was reviewed.                                                                                                               |                                                                                                                                                                                                                                                               |
| <b>55. Participating in a conversation</b>                           | 22<br>(92%) | 1<br>(4%)  | 1<br>(4%)  | 19<br>(79%) | 3<br>(12%) | 2<br>(8%) | 21<br>(87%) | 1<br>(4%) | 2<br>(8%) | Persons appear to be arguing.                                                                                                                                                                                                                                                    | Non-verbal behaviours do not reflect meaning. | 79% said the picture was clear, but qualitative data suggested non-verbal behaviors do not reflect meaning. Picture was reviewed.                 | No changes were made as here was no apparent way to make the picture clearer.                                                                                                                                                                                 |
| <b>56. Knowing what is appropriate to talk about, with who/where</b> | 18<br>(75%) | 3<br>(13%) | 3<br>(13%) | 14<br>(58%) | 9<br>(38%) | 1<br>(4%) | 21<br>(87%) | 1<br>(4%) | 2<br>(8%) | Knowing what is appropriate to talk about; 56 looks like they are telling secrets and they both look scared; The knowing what is appropriate to talk about could have a speech bubble with ^%\$)^%#% and a "no" sign over it. The current one looks like two people being upset: | Non-verbal behaviours do not reflect meaning. | 42% said no/not sure regarding picture clarity, and qualitative data suggested non-verbal behaviors do not reflect meaning. Picture was reviewed. | The picture was adjusted so that the male is smiling (e.g., thinks he is being funny but doesn't realize he is inappropriate) and the girl's hand closer is over her mouth, blush to cheeks added to indicate embarrassment and speech bubble "#*!?!#" added. |
| <b>57. Using phone/mobile/email</b>                                  | 20<br>(83%) | 2<br>(8%)  | 2<br>(8%)  | 20<br>(83%) | 2<br>(8%)  | 2<br>(8%) | 21<br>(87%) | 1<br>(4%) | 2<br>(8%) | NIL                                                                                                                                                                                                                                                                              | NIL                                           | 83% said the picture was clear. No qualitative comments.                                                                                          | No changes were made.                                                                                                                                                                                                                                         |
| <b>58. Giving instructions to others</b>                             | 19<br>(79%) | 4<br>(16%) | 1<br>(4%)  | 19<br>(79%) | 3<br>(12%) | 1<br>(4%) | 20<br>(83%) | 2<br>(8%) | 2<br>(8%) | NIL                                                                                                                                                                                                                                                                              | NIL                                           | 79% said the picture was clear. No qualitative comments.                                                                                          | No changes were made.                                                                                                                                                                                                                                         |
| <b>FINANCES</b>                                                      |             |            |            |             |            |           |             |           |           |                                                                                                                                                                                                                                                                                  |                                               |                                                                                                                                                   |                                                                                                                                                                                                                                                               |



|                                    |             |            |            |             |            |            |             |            |           |                                                                                                                                                                             |                                       |                                                                                                                                                                   |                                                                                                                                                                                                         |
|------------------------------------|-------------|------------|------------|-------------|------------|------------|-------------|------------|-----------|-----------------------------------------------------------------------------------------------------------------------------------------------------------------------------|---------------------------------------|-------------------------------------------------------------------------------------------------------------------------------------------------------------------|---------------------------------------------------------------------------------------------------------------------------------------------------------------------------------------------------------|
| <b>59. Making purchases</b>        | 22<br>(92%) | 1<br>(4%)  | 1<br>(4%)  | 22<br>(92%) | 1<br>(4%)  | 1<br>(4%)  | 18<br>(78%) | 4<br>(17%) | 1<br>(4%) | Maybe finance goals need to be broken down e.g., paying & understanding bills; Budgeting; Banking/dealing with banks; Understanding the value of money; Anticipating needs. | Suggested different goals.            | 92% said goal was important. 92% said the picture was clear. 78% said wording was clear. Qualitative data suggested different financial goals. Goal was reviewed. | Suggested goals are covered by other goals (e.g., managing money covers budgeting, banking, paying bills). No picture changes were made. The wording on the card was simplified to <i>Buying Things</i> |
| <b>60. Managing money</b>          | 23<br>(96%) | 1<br>(4%)  | 0<br>(0%)  | 20<br>(83%) | 2<br>(8%)  | 2<br>(8%)  | 22<br>(92%) | 1<br>(4%)  | 1<br>(4%) | Piggy bank is dated.                                                                                                                                                        | Details inappropriate or unnecessary. | 83% said the picture was clear, but qualitative data suggested details inappropriate (outdated). Picture was reviewed.                                            | No changes were made, as there was no apparent way to make the picture clearer.                                                                                                                         |
| <b>61. Understanding contracts</b> | 18<br>(75%) | 2<br>(8%)  | 4<br>(16%) | 15<br>(63%) | 6<br>(25%) | 3<br>(12%) | 18<br>(75%) | 5<br>(21%) | 1<br>(4%) | Could be re drawn to show just one contract and the word 'signature' at the bottom and someone is holding it with a pen and about to sign.                                  | Alternative picture suggested.        | 37% said no/not sure with regarding picture clarity, but qualitative data suggested and alternative picture. Picture was reviewed.                                | New picture created of picture of just a contract with hand signing it.                                                                                                                                 |
| <b>62. Doing tax returns</b>       | 18<br>(75%) | 3<br>(13%) | 3<br>(13%) | 19<br>(79%) | 2<br>(8%)  | 3<br>(12%) | 20<br>(83%) | 2<br>(8%)  | 2<br>(8%) | Online tax return with pile of receipts, notes and calculator.                                                                                                              | Details inappropriate or unnecessary. | 79% said the picture was clear, but qualitative data suggested inappropriate details Picture was reviewed.                                                        | No changes were made, as there was no apparent way to make the picture clearer.                                                                                                                         |

**EMOTIONAL WELLBEING**

|                                                                                |             |           |           |             |            |           |             |            |           |                                                                         |                                                                        |                                                                                                                                        |                                                                                                                                                                                         |
|--------------------------------------------------------------------------------|-------------|-----------|-----------|-------------|------------|-----------|-------------|------------|-----------|-------------------------------------------------------------------------|------------------------------------------------------------------------|----------------------------------------------------------------------------------------------------------------------------------------|-----------------------------------------------------------------------------------------------------------------------------------------------------------------------------------------|
| <b>63. Staying calm/Understanding and managing own emotions and behaviours</b> | 23<br>(96%) | 1<br>(4%) | 0<br>(0%) | 16<br>(67%) | 8<br>(33%) | 0<br>(0%) | 22<br>(92%) | 2<br>(8%)  | 0<br>(0%) | Staying calm looks like two people in uniform, one scared of the other. | Meaning of picture is not clear.                                       | 37% said no/not sure regarding picture clarity, and qualitative data suggested meaning of picture is not clear. Picture was reviewed.  | Picture changed: Faces inserted into a picture of a stress scale with an arrow pointing to 'Calm';                                                                                      |
| <b>64. Getting emotional support</b>                                           | 23<br>(96%) | 0<br>(0%) | 1<br>(4%) | 21<br>(88%) | 3<br>(12%) | 0<br>(0%) | 20<br>(83%) | 3<br>(13%) | 1<br>(4%) | Looks like how to deal with overfriendly people.                        | Meaning of picture is not clear.                                       | 79% said the picture was clear, but qualitative data suggested meaning of picture is not clear. Picture was reviewed.                  | Picture changed so that instead of person needing support is being touched on the shoulder, both people are seated facing each other. Explicit cues added: Tissues and cup of tea added |
| <b>65. Preparing for change</b>                                                | 23<br>(96%) | 1<br>(4%) | 0<br>(0%) | 21<br>(88%) | 2<br>(8%)  | 1<br>(4%) | 21<br>(87%) | 1<br>(4%)  | 2<br>(8%) | Maybe more concrete change (house move, relationship break-ups)         | Meaning of picture is not clear.                                       | 79% said the picture was clear but qualitative data suggested Meaning of picture is not clear. Picture was reviewed.                   | No changes were made, due to concerns that house move/relationship breakup would make picture overly complex and add confusion.                                                         |
| <b>66. Relaxing</b>                                                            | 23<br>(96%) | 1<br>(4%) | 0<br>(0%) | 22<br>(92%) | 2<br>(8%)  | 0<br>(0%) | 23<br>(96%) | 1<br>(4%)  | 0<br>(0%) | Relaxing looks over-stimulating with loud music/ partying/holidays.     | Meaning of picture is not clear. Details inappropriate or unnecessary. | 79% said the picture was clear, but qualitative data suggested meaning of picture is unclear and details inappropriate or unnecessary. | Picture was adjusted by removing music and speakers and changing to a garden-like setting.                                                                                              |

|                                            |             |           |           |             |            |           |             |           |           |                                                                                                |                                                     |                                                                                                                                                                |                                                                                                                                                                                                        |
|--------------------------------------------|-------------|-----------|-----------|-------------|------------|-----------|-------------|-----------|-----------|------------------------------------------------------------------------------------------------|-----------------------------------------------------|----------------------------------------------------------------------------------------------------------------------------------------------------------------|--------------------------------------------------------------------------------------------------------------------------------------------------------------------------------------------------------|
|                                            |             |           |           |             |            |           |             |           |           |                                                                                                |                                                     |                                                                                                                                                                |                                                                                                                                                                                                        |
| <b>67. Coping with sensory challenges</b>  | 23<br>(96%) | 0<br>(0%) | 1<br>(4%) | 21<br>(88%) | 1<br>(4%)  | 2<br>(8%) | 22<br>(92%) | 0<br>(0%) | 2<br>(8%) | What about sight? I love the sensory challenges one so much!                                   | Additional detail suggested.                        | 79% said the picture was clear, but qualitative data suggested adding additional details. Picture was reviewed.                                                | No changes were made (visual sensitivities are difficult to illustrate).                                                                                                                               |
| <b>68. Doing activities I enjoy</b>        | 23<br>(96%) | 0<br>(0%) | 1<br>(4%) | 22<br>(92%) | 2<br>(8%)  | 0<br>(0%) | 22<br>(92%) | 2<br>(8%) | 0<br>(0%) | Is this about finding things to do? Finding time? Working out what is needed? Learning skills? | Meaning of picture is not clear.<br>Goal not clear. | 96% said goal was important, and 92% said the picture was clear, but qualitative data suggested meaning of picture is unclear. Goal and picture were reviewed. | No changes were made (the goal could be about exploring new interests or spending more time doing enjoyable activities).                                                                               |
| <b>69. Staying safe</b>                    | 23<br>(96%) | 1<br>(4%) | 0<br>(0%) | 20<br>(83%) | 3<br>(12%) | 1<br>(4%) | 20<br>(83%) | 2<br>(8%) | 2<br>(8%) | Didn't understand this picture meant.                                                          | Meaning of picture is not clear.                    | 83% said the picture was clear, but qualitative data suggested meaning of picture is unclear. Picture and wording were reviewed.                               | Picture was adjusted to make meaning more explicit (hand approaching girl's breast). Additional wording added (e.g., saying no to touch I don't want and not touching others when they don't want it). |
| <b>70. Understanding/explaining Autism</b> | 22<br>(92%) | 2<br>(8%) | 0<br>(0%) | 20<br>(83%) | 3<br>(12%) | 1<br>(4%) | 22<br>(92%) | 2<br>(8%) | 0<br>(0%) | Maybe you could use the neurodiversity symbol (rainbow infinity) in the understanding autism.  | Additional detail suggested.                        | 83% said the picture was clear. Qualitative data suggested adding additional details.                                                                          | Additional detail added as suggested: The neurodiversity symbol added.                                                                                                                                 |

|                                                           |             |            |            |             |            |            |             |            |           |                                                                                                                                                           |                                       |                                                                                                                                |                                                                                               |
|-----------------------------------------------------------|-------------|------------|------------|-------------|------------|------------|-------------|------------|-----------|-----------------------------------------------------------------------------------------------------------------------------------------------------------|---------------------------------------|--------------------------------------------------------------------------------------------------------------------------------|-----------------------------------------------------------------------------------------------|
|                                                           |             |            |            |             |            |            |             |            |           |                                                                                                                                                           |                                       |                                                                                                                                |                                                                                               |
| <b>71. Connecting with others in the Autism community</b> | 22<br>(92%) | 0<br>(0%)  | 2<br>(8%)  | 16<br>(67%) | 4<br>(17%) | 4<br>(17%) | 19<br>(79%) | 4<br>(17%) | 1<br>(4%) | At the moment there's nothing visual on them that shows that they're specifically about autism, and not just reading together and connecting with others; | Meaning of picture is not clear.      | 24% said no/not sure regarding picture clarity. Qualitative data suggests meaning of picture is unclear. Picture was reviewed. | No change made, as there was no obvious way to make the picture more explicitly about autism. |
| <b>72. Exploring/meeting spiritual needs</b>              | 17<br>(71%) | 3<br>(13%) | 4<br>(16%) | 19<br>(79%) | 4<br>(17%) | 1<br>(4%)  | 21<br>(87%) | 2<br>(8%)  | 1<br>(4%) | The person in green has stubs for hands (hands in prayer positions).                                                                                      | Inappropriate or unnecessary details. | 83% said the picture was clear, but qualitative data suggested some details are inappropriate. Picture was reviewed.           | Details of picture were altered by adding thumbs to hands of person praying.                  |
