# Supplementary material
Source: PubMed Central journal article supplement (PMC10024266)
Supplement: Supp_TableS2.pdf [file Supp_TableS2.pdf]

**Table S2**

*Survey 2: Quantitative and qualitative survey results, qualitative content analysis, research team reflection and revised plan*

| ACT                               | OBSERVE (Collect and Analyse Data) (n = 32 surveys returned)    |              |         |                                                                                    |              |         |                                                                                |              |        | REFLECT                                                                                                                                                                                                                                               | REVISED PLAN                                                                   |                                                                                                                                                                                                                                    |                                                                                                                   |
|-----------------------------------|-----------------------------------------------------------------|--------------|---------|------------------------------------------------------------------------------------|--------------|---------|--------------------------------------------------------------------------------|--------------|--------|-------------------------------------------------------------------------------------------------------------------------------------------------------------------------------------------------------------------------------------------------------|--------------------------------------------------------------------------------|------------------------------------------------------------------------------------------------------------------------------------------------------------------------------------------------------------------------------------|-------------------------------------------------------------------------------------------------------------------|
| Goal card                         | Quantitative data                                               |              |         |                                                                                    |              |         | Qualitative data                                                               |              |        | Reflections on quantitative and qualitative data                                                                                                                                                                                                      | Reasoning behind the research team decision-making                             |                                                                                                                                                                                                                                    |                                                                                                                   |
|                                   | Is this goal likely to be important to someone on the spectrum? |              |         | Does the picture on this goal card help you to understand what this goal is about? |              |         | Do the words on this goal card help you to understand what this goal is about? |              |        |                                                                                                                                                                                                                                                       |                                                                                | Responses to open-ended question:<br><i>In this category, were there any goals or pictures that you found confusing or that you think need to be changed or simplified? If yes, please let us know which goal/picture and why.</i> | Content analysis (themes that emerged from data)                                                                  |
| Yes (%)                           | No (%)                                                          | Not sure (%) | Yes (%) | No (%)                                                                             | Not sure (%) | Yes (%) | No (%)                                                                         | Not sure (%) |        |                                                                                                                                                                                                                                                       |                                                                                |                                                                                                                                                                                                                                    |                                                                                                                   |
| <b>SOCIAL RELATIONSHIPS</b>       |                                                                 |              |         |                                                                                    |              |         |                                                                                |              |        |                                                                                                                                                                                                                                                       |                                                                                |                                                                                                                                                                                                                                    |                                                                                                                   |
| 1. Getting along with others.     | 28 (88%)                                                        | 0 (0%)       | 4 (13%) | 23 (72%)                                                                           | 5 (16%)      | 4 (13%) | 32 (100%)                                                                      | 0 (0%)       | 0 (0%) | Before reading...I thought the card would have been "talking" to friends/people. Not sure how you could change/simplify though. Yes - different picture; Honestly when I look at that picture all I see is people sitting down...; All people smiling | Meaning of picture is not clear.                                               | 29% said no/not sure about picture clarity, and qualitative data suggested meaning of is unclear. Picture was reviewed.                                                                                                            | New picture created: Neighbours chatting over fence with a speech bubble with young person saying, "How are you?" |
| 2. Making friends/ being a friend | 28 (88%)                                                        | 3 (9%)       | 1 (3%)  | 26 (81%)                                                                           | 3 (9%)       | 3 (9%)  | 31 (97%)                                                                       | 0 (0%)       | 1 (3%) | Same people two scenes, outside then online; Taking a photo relating to being a friend; Not sure if these "friends" should be hugging due to ASD                                                                                                      | Meaning of picture is not clear. Non-verbal behaviours do not reflect meaning. | 81% said the picture was clear, but qualitative data suggested meaning                                                                                                                                                             | New picture created: Two people taking a selfie. Non-verbal behaviour changed                                     |

|                                 |             |            |           |             |            |            |             |            |                                                                                                                                                                                                   |                                                                                                                                                                                                                                                                                                                                                                                                                                                                                                                                          |                                                                                                                        |                                                                                                                                                                                                                     |                                                                                                                                                                                                                                                                                                 |
|---------------------------------|-------------|------------|-----------|-------------|------------|------------|-------------|------------|---------------------------------------------------------------------------------------------------------------------------------------------------------------------------------------------------|------------------------------------------------------------------------------------------------------------------------------------------------------------------------------------------------------------------------------------------------------------------------------------------------------------------------------------------------------------------------------------------------------------------------------------------------------------------------------------------------------------------------------------------|------------------------------------------------------------------------------------------------------------------------|---------------------------------------------------------------------------------------------------------------------------------------------------------------------------------------------------------------------|-------------------------------------------------------------------------------------------------------------------------------------------------------------------------------------------------------------------------------------------------------------------------------------------------|
|                                 |             |            |           |             |            |            |             |            | <p>tendency to move into other's personal space.</p> <p>Yes - different picture</p> <p>Most kids on the spectrum play computer or tablet games and aren't interested in what other people do.</p> |                                                                                                                                                                                                                                                                                                                                                                                                                                                                                                                                          | <p>of picture is unclear and non-verbal behaviours do not reflect meaning. Picture was reviewed.</p>                   | <p>to no hugging, arms down and leaning inwards. Explicit cue added - both people 'friends forever' t-shirts</p>                                                                                                    |                                                                                                                                                                                                                                                                                                 |
| <b>3. Dealing with conflict</b> | 26<br>(81%) | 3<br>(9%)  | 3<br>(9%) | 23<br>(72%) | 7<br>(22%) | 2<br>(6%)  | 29<br>(91%) | 2<br>(6%)  | 1<br>(3%)                                                                                                                                                                                         | <p>Do you need an arrow from the conflict to the resolution? Yes - different picture; The upper part of the picture just looks like two people looking at something... Maybe a picture of the person turned away more? Conflict has to be explained. Conflict needs to be more obvious</p>                                                                                                                                                                                                                                               | <p>Meaning of picture is not clear. Non-verbal behaviours do not reflect meaning</p>                                   | <p>29% said no/not sure about picture clarity, and qualitative data suggested meaning of picture is unclear with non-verbal behaviours that do not reflect meaning. Picture was reviewed.</p>                       | <p>Picture was altered so that second figure is looking back over shoulder at the other person, so it is clear who he is angry at. Explicit cue added: arrow between 2 halves to show progression to resolution of conflict.</p>                                                                |
| <b>4. Physical Affection</b>    | 25<br>(78%) | 4<br>(13%) | 3<br>(9%) | 20<br>(63%) | 8<br>(25%) | 4<br>(13%) | 27<br>(84%) | 4<br>(13%) | 1<br>(3%)                                                                                                                                                                                         | <p>Maybe adding some other types of affection. Both examples seem very physically intimate. Could have another example that is less intimate. Also, may be an example of someone letting another know they don't want that level of intimacy and that's okay. Consider that physical affection doesn't need to be all about hugging- maybe holding hands is option for one picture; Thought the picture was "it's OK to love someone if you are young or old"; different picture; Pictures are overdone. is the picture androgynous?</p> | <p>Additional picture details suggested. Change of picture suggested. Non-verbal behaviours do not reflect meaning</p> | <p>29% said no/not sure about picture clarity, and qualitative data suggested non-verbal behaviours do not reflect meaning and suggested changes to picture details or change of picture. Picture was reviewed.</p> | <p>Picture was altered by removing love hearts from bottom picture (grandma hugging young person – not intended to be romantic). Non-verbal behavior change - Grandma putting hands on shoulders of younger person to show more gentle affection (less intimate gesture than a 'bear hug').</p> |

|                                                                 |             |           |           |             |            |            |             |           |           |                                                                                                                                                                                                                                                                                                                                                                                                                                                                                                                                 |                                                                                                 |                                                                                                                                                                                                                                                |                                                                                                                                                                                                                                                                                                            |
|-----------------------------------------------------------------|-------------|-----------|-----------|-------------|------------|------------|-------------|-----------|-----------|---------------------------------------------------------------------------------------------------------------------------------------------------------------------------------------------------------------------------------------------------------------------------------------------------------------------------------------------------------------------------------------------------------------------------------------------------------------------------------------------------------------------------------|-------------------------------------------------------------------------------------------------|------------------------------------------------------------------------------------------------------------------------------------------------------------------------------------------------------------------------------------------------|------------------------------------------------------------------------------------------------------------------------------------------------------------------------------------------------------------------------------------------------------------------------------------------------------------|
|                                                                 |             |           |           |             |            |            |             |           |           | might be confusing culturally or morally?                                                                                                                                                                                                                                                                                                                                                                                                                                                                                       |                                                                                                 |                                                                                                                                                                                                                                                |                                                                                                                                                                                                                                                                                                            |
| <b>5. Understanding which behaviours should be kept private</b> | 29<br>(91%) | 0<br>(0%) | 3<br>(9%) | 29<br>(91%) | 3<br>(9%)  | 0<br>(0%)  | 28<br>(88%) | 3<br>(9%) | 1<br>(3%) | Very confusing design. I'm not sure relevance of the naked person. Behaviours might need to be explained in terms of appropriateness. Is this just about physical privacy?                                                                                                                                                                                                                                                                                                                                                      | Meaning of picture is not clear.                                                                | 91% said picture was clear but qualitative data suggested meaning of picture is unclear. Picture was reviewed.                                                                                                                                 | Picture was not changed as there was no apparent way to make the picture clearer.                                                                                                                                                                                                                          |
| <b>6. Visiting people/having someone over</b>                   | 28<br>(88%) | 2<br>(6%) | 2<br>(6%) | 20<br>(63%) | 7<br>(22%) | 5<br>(16%) | 29<br>(91%) | 2<br>(6%) | 1<br>(3%) | A comparison scene showing correct enthusiasm; The visitor's body language is extreme. If someone came in like that, I would feel startled and a bit scared. The visitor's body language could be a little overwhelming for someone on the spectrum. Smiling face is good. Looks like an overreaction by the person visiting- needs side on perspective of person opening door to visitor. Simplified words - Friend visits; different picture; The design of the card suggest accomplishment or winning rather than friendship | Non-verbal behaviours do not reflect meaning. Alternative picture suggested. Wording not clear. | 38% said no/not sure about picture, and qualitative data suggested non-verbal behaviours do not reflect meaning and suggested changes to picture details or change of picture. Wording was also questioned. Picture and wording were reviewed. | As most comments were about non-verbal behaviour, the non-verbal behaviour of first figure was altered (leg down, arms at same level as girl's as if waving 'hi'). There was no obvious way to depict the act of visiting someone/having someone more clearly, and no obvious way to make wording clearer. |
| <b>7. Hosting or attending social gatherings/events</b>         | 23<br>(85%) | 2<br>(7%) | 2<br>(7%) | 26<br>(81%) | 3<br>(9%)  | 3<br>(9%)  | 30<br>(94%) | 0<br>(0%) | 2<br>(6%) | Thought the picture was about "accepting all different coloured skin". Cards fine; Design of the card doesn't reflect the goal text. Could be about anything.                                                                                                                                                                                                                                                                                                                                                                   | Meaning of picture is not clear.                                                                | 81% said the picture was clear, but qualitative data suggested meaning of picture is unclear. Picture was reviewed.                                                                                                                            | Explicit cue added to enhance meaning: Change to word on banner to 'Party!' with whole word visible.                                                                                                                                                                                                       |

|                                                       |                     |                    |                    |                     |                    |                    |                      |                   |                   |                                                                                                                                                                                                                                                                                          |                                                                               |                                                                                                                                                                         |                                                                                                                                                                                                          |
|-------------------------------------------------------|---------------------|--------------------|--------------------|---------------------|--------------------|--------------------|----------------------|-------------------|-------------------|------------------------------------------------------------------------------------------------------------------------------------------------------------------------------------------------------------------------------------------------------------------------------------------|-------------------------------------------------------------------------------|-------------------------------------------------------------------------------------------------------------------------------------------------------------------------|----------------------------------------------------------------------------------------------------------------------------------------------------------------------------------------------------------|
| <p><b>8. Being part of a social group of club</b></p> | <p>24<br/>(89%)</p> | <p>2<br/>(7%)</p>  | <p>1<br/>(4%)</p>  | <p>26<br/>(81%)</p> | <p>4<br/>(13%)</p> | <p>2<br/>(6%)</p>  | <p>30<br/>(97%)</p>  | <p>1<br/>(3%)</p> | <p>0<br/>(0%)</p> | <p>Thought this was about different religions getting together. The card itself is fine but the topic is very broad, and especially the special interest group part could mean anything from Tabletop Wargaming to Haircuts; Card games are so boring. Should be multiple activities</p> | <p>Meaning of picture is not clear. Additional picture details suggested.</p> | <p>81% said picture was clear, but qualitative data suggested meaning of picture is unclear with additional picture details suggested. Picture was reviewed.</p>        | <p>Picture not changed as adding extra games would have increased complexity and confusion.</p>                                                                                                          |
| <p><b>9. Caring for others</b></p>                    | <p>20<br/>(74%)</p> | <p>3<br/>(11%)</p> | <p>4<br/>(15%)</p> | <p>27<br/>(84%)</p> | <p>3<br/>(9%)</p>  | <p>2<br/>(6%)</p>  | <p>32<br/>(100%)</p> | <p>0<br/>(0%)</p> | <p>0<br/>(0%)</p> | <p>Not sure how - but she didn't get that the pictures were about "caring"; The card is fine; Without text this card would be confusing</p>                                                                                                                                              | <p>Meaning of picture is not clear.</p>                                       | <p>84% said picture was clear, but qualitative data suggested meaning of picture is unclear. Picture was reviewed.</p>                                                  | <p>The picture was not changed, as there was no apparent way to make the picture clearer.</p>                                                                                                            |
| <p><b>10. Dating/finding a partner</b></p>            | <p>25<br/>(93%)</p> | <p>0<br/>(0%)</p>  | <p>2<br/>(7%)</p>  | <p>26<br/>(81%)</p> | <p>4<br/>(13%)</p> | <p>2<br/>(6%)</p>  | <p>29<br/>(94%)</p>  | <p>1<br/>(3%)</p> | <p>1<br/>(3%)</p> | <p>Is this about politics?</p>                                                                                                                                                                                                                                                           | <p>Meaning of picture is not clear.</p>                                       | <p>81% said picture was clear, but qualitative data suggested meaning of picture is unclear. Picture was reviewed.</p>                                                  | <p>The picture was not changed, as there was no apparent way to make the picture clearer.</p>                                                                                                            |
| <p><b>11. Being in a long-term relationship</b></p>   | <p>24<br/>(89%)</p> | <p>0<br/>(0%)</p>  | <p>3<br/>(11%)</p> | <p>23<br/>(72%)</p> | <p>4<br/>(13%)</p> | <p>5<br/>(16%)</p> | <p>30<br/>(94%)</p>  | <p>1<br/>(3%)</p> | <p>1<br/>(3%)</p> | <p>I think this card could be a split card with a young couple... then an older couple; think the concept of long term needs to be concrete i.e., use of numbers, calendar etc. Picture does not show long term relationship. Could be just friends holding hands or family members</p>  | <p>Meaning of picture is not clear. Additional picture details suggested.</p> | <p>29% said no/not sure about picture clarity, and qualitative data suggested meaning of picture is unclear and additional details suggested. Picture was reviewed.</p> | <p>Picture changed by adding explicit cues - a "Happy Anniversary" card between two people sitting on a picnic rug. Picture details changed - sunset removed so focus is on "Happy Anniversary" card</p> |

|                                         |                                                           |                                                         |                                                          |                                                                                                                                                                                                                                                                                                                                                                                                  |                                                                        |                                                                                                                                                                                                        |                                                                                                                                                                                                                                                                                                            |
|-----------------------------------------|-----------------------------------------------------------|---------------------------------------------------------|----------------------------------------------------------|--------------------------------------------------------------------------------------------------------------------------------------------------------------------------------------------------------------------------------------------------------------------------------------------------------------------------------------------------------------------------------------------------|------------------------------------------------------------------------|--------------------------------------------------------------------------------------------------------------------------------------------------------------------------------------------------------|------------------------------------------------------------------------------------------------------------------------------------------------------------------------------------------------------------------------------------------------------------------------------------------------------------|
| <p><b>12. Becoming a parent</b></p>     | <p>18<br/>(67%)</p> <p>4<br/>(15%)</p> <p>5<br/>(19%)</p> | <p>26<br/>(81%)</p> <p>3<br/>(9%)</p> <p>3<br/>(9%)</p> | <p>29<br/>(91%)</p> <p>1<br/>(3%)</p> <p>2<br/>(6%)</p>  | <p>This card is about diet. I'm not sure our kids and young people can understand that concept; Where are the gender issues now?</p>                                                                                                                                                                                                                                                             | <p>Meaning of picture is not clear.</p>                                | <p>81% said picture was clear, but qualitative data suggested meaning of picture is unclear. Picture was reviewed.</p>                                                                                 | <p>Picture was not changed as there is no apparent way to make the picture clearer. Man included in picture as some men may want to become parents.</p>                                                                                                                                                    |
| <p><b>13. Being a good parent</b></p>   | <p>23<br/>(85%)</p> <p>1<br/>(4%)</p> <p>3<br/>(4%)</p>   | <p>26<br/>(81%)</p> <p>3<br/>(9%)</p> <p>3<br/>(9%)</p> | <p>31<br/>(97%)</p> <p>1<br/>(3%)</p> <p>0<br/>(0%)</p>  | <p>What is "good" parenting. need to be more explicit; The cards fine overall but, your previous set of questions was about being a parent, wouldn't it be common sense to assume that means a parent that is actually good?</p>                                                                                                                                                                 | <p>Wording not clear.</p>                                              | <p>85% said goal is important, and 97% said wording was clear. Wording was reviewed.</p>                                                                                                               | <p>Wording was not changed as being good at parenting may be important goal for people who are already parents (previous goal is about becoming a parent)</p>                                                                                                                                              |
| <p><b>SELF-CARE AND HOME LIVING</b></p> |                                                           |                                                         |                                                          |                                                                                                                                                                                                                                                                                                                                                                                                  |                                                                        |                                                                                                                                                                                                        |                                                                                                                                                                                                                                                                                                            |
| <p><b>14. Eating and drinking</b></p>   | <p>25<br/>(96%)</p> <p>1<br/>(4%)</p> <p>0<br/>(0%)</p>   | <p>27<br/>(90%)</p> <p>1<br/>(3%)</p> <p>2<br/>(7%)</p> | <p>31<br/>(100%)</p> <p>0<br/>(0%)</p> <p>0<br/>(0%)</p> | <p>Show Healthy verses unhealthy; This card feels unnecessary. I'm Autistic myself and I know to eat and drink, preferably water and fruit, vegetables, and some meat, so I don't see why this card is necessary. Show the person cooking or choosing healthy food; this can be a social thing as well. Being able to eat food at social gatherings while managing sensory and social issues</p> | <p>Goals not relevant to some people. Change of picture suggested.</p> | <p>96% said goal is important and 90% said picture was clear. Qualitative data suggested goals may not be relevant to some people and suggested change of picture. Goal and picture were reviewed.</p> | <p>Picture was not changed as there was no apparent way to make it clearer. Goal is likely to be important to autistic people with limited diets or challenges in using cutlery. Concerns that suggested picture changes may overlap with "Keeping fit and healthy" card (includes healthy eating) and</p> |

|                                               |             |            |            |              |           |           |              |           |           |                                                                                                                                                                                                                       |                                                  |                                                                                                         |                                                                                                                                      |  |  |  |                                           |
|-----------------------------------------------|-------------|------------|------------|--------------|-----------|-----------|--------------|-----------|-----------|-----------------------------------------------------------------------------------------------------------------------------------------------------------------------------------------------------------------------|--------------------------------------------------|---------------------------------------------------------------------------------------------------------|--------------------------------------------------------------------------------------------------------------------------------------|--|--|--|-------------------------------------------|
|                                               |             |            |            |              |           |           |              |           |           |                                                                                                                                                                                                                       |                                                  |                                                                                                         |                                                                                                                                      |  |  |  | 'Planning and preparing meals' (cooking). |
| <b>15. Using the toilet</b>                   | 21<br>(81%) | 2<br>(8%)  | 3<br>(12%) | 29<br>(94%)  | 1<br>(3%) | 1<br>(3%) | 29<br>(94%)  | 1<br>(3%) | 1<br>(3%) | Have someone on the toilet, Using the bathroom. Perhaps showing a person sitting on the toilet doing their business without it looking rude. Show more specific steps. e.g., toilet paper, flushing and washing hands | Additional picture details suggested.            | 90% said picture was clear. Qualitative data suggested adding additional details. Picture was reviewed. | Picture was not changed, no apparent way to make the picture clearer – adding additional steps would have made the card too crowded. |  |  |  |                                           |
| <b>16. Sleeping</b>                           | 23<br>(88%) | 2<br>(8%)  | 1<br>(4%)  | 31<br>(100%) | 0<br>(0%) | 0<br>(0%) | 31<br>(100%) | 0<br>(0%) | 0<br>(0%) | NIL                                                                                                                                                                                                                   | NIL                                              | 100% said picture was clear. No qualitative comments.                                                   | No change required.                                                                                                                  |  |  |  |                                           |
| <b>17. Dressing myself appropriately</b>      | 22<br>(85%) | 2<br>(8%)  | 2<br>(8%)  | 28<br>(90%)  | 2<br>(6%) | 1<br>(3%) | 31<br>(100%) | 0<br>(0%) | 0<br>(0%) | NIL                                                                                                                                                                                                                   | NIL                                              | 90% said picture was clear. No qualitative comments.                                                    | No change required.                                                                                                                  |  |  |  |                                           |
| <b>18. Grooming</b>                           | 23<br>(88%) | 3<br>(12%) | 0<br>(0%)  | 30<br>(97%)  | 0<br>(0%) | 1<br>(3%) | 31<br>(100%) | 0<br>(0%) | 0<br>(0%) | NIL                                                                                                                                                                                                                   | NIL                                              | 97% said picture was clear. No qualitative comments.                                                    | No change required.                                                                                                                  |  |  |  |                                           |
| <b>19. Understanding and managing periods</b> | 22<br>(85%) | 0<br>(0%)  | 4<br>(15%) | 27<br>(87%)  | 2<br>(6%) | 2<br>(6%) | 31<br>(100%) | 0<br>(0%) | 0<br>(0%) | NIL                                                                                                                                                                                                                   | NIL                                              | 87% said picture was clear. No qualitative comments.                                                    | No change required.                                                                                                                  |  |  |  |                                           |
| <b>20. Planning and preparing meals</b>       | 23<br>(88%) | 1<br>(4%)  | 2<br>(8%)  | 29<br>(94%)  | 2<br>(6%) | 0<br>(0%) | 30<br>(100%) | 0<br>(0%) | 0<br>(0%) | On calendar show days of scribble                                                                                                                                                                                     | Inappropriate or unnecessary details in picture. | 94% said picture was clear, but qualitative comments suggested inappropriate details in picture.        | No change made, as the meal plan on the wall is too small to include legible writing.                                                |  |  |  |                                           |

|                                      |             |            |            |             |            |           |              |           |           |                                                                                                                                                                                                                        |                                                                          |                                                                                                                                                                                                                                            |                                                                                                                                                                                                 |
|--------------------------------------|-------------|------------|------------|-------------|------------|-----------|--------------|-----------|-----------|------------------------------------------------------------------------------------------------------------------------------------------------------------------------------------------------------------------------|--------------------------------------------------------------------------|--------------------------------------------------------------------------------------------------------------------------------------------------------------------------------------------------------------------------------------------|-------------------------------------------------------------------------------------------------------------------------------------------------------------------------------------------------|
|                                      |             |            |            |             |            |           |              |           |           |                                                                                                                                                                                                                        |                                                                          | Picture was reviewed.                                                                                                                                                                                                                      |                                                                                                                                                                                                 |
| <b>21. Doing house chores</b>        | 21<br>(81%) | 2<br>(8%)  | 3<br>(12%) | 29<br>(94%) | 1<br>(3%)  | 1<br>(3%) | 31<br>(100%) | 0<br>(0%) | 0<br>(0%) | NIL                                                                                                                                                                                                                    | NIL                                                                      | 94% said picture was clear. No qualitative comments.                                                                                                                                                                                       | No change required.                                                                                                                                                                             |
| <b>22. Caring for pets</b>           | 22<br>(85%) | 2<br>(8%)  | 2<br>(8%)  | 29<br>(94%) | 2<br>(6%)  | 0<br>(0%) | 31<br>(100%) | 0<br>(0%) | 0<br>(0%) | Maybe also show a character giving the pet water and food also. While I see why this card exists it does suggest caring for a pet is something all Autistics do, I'm sure most do, but not all, just worth mentioning. | Additional picture details suggested. Goals not relevant to some people. | 85% said the goal is important and 94% said the picture is clear, but qualitative data suggested adding additional details to picture, and suggested that the goal is not relevant to all autistic people. Goal and picture were reviewed. | No change was made as additional details would add complexity to the picture. The goal was retained as having a pet is likely to be important to some autistic people.                          |
| <b>23. Moving out of home</b>        | 21<br>(81%) | 3<br>(12%) | 2<br>(8%)  | 28<br>(90%) | 1<br>(3%)  | 2<br>(6%) | 29<br>(97%)  | 1<br>(3%) | 0<br>(0%) | Could be packing for holiday, would show empty room and then full car                                                                                                                                                  | Meaning of picture is not clear.                                         | 90% said picture was clear but qualitative data suggested that the picture does not convey meaning clearly. Picture was reviewed.                                                                                                          | No change was made as adding an empty room would have increased complexity of card. Tearful parents and packing boxes are intended to convey moving out of home rather than going on a holiday. |
| <b>STUDY AND TRAINING</b>            |             |            |            |             |            |           |              |           |           |                                                                                                                                                                                                                        |                                                                          |                                                                                                                                                                                                                                            |                                                                                                                                                                                                 |
| <b>24. Getting better at reading</b> | 19<br>(76%) | 2<br>(8%)  | 4<br>(16%) | 23<br>(77%) | 6<br>(20%) | 1<br>(3%) | 29<br>(97%)  | 1<br>(3%) | 0<br>(0%) | This card is really good, in fact this card is valid for even non-Autistics.                                                                                                                                           | Additional picture details suggested.                                    | 77% said picture was clear, but qualitative data                                                                                                                                                                                           | No change was made as adding extra detail would                                                                                                                                                 |

|                                                                                          |             |            |            |             |            |           |              |           |                                                                                            |                                                                                                                                                                                  |                                                                    |                                                                                                                                |                                                                                                                                                                                                                 |
|------------------------------------------------------------------------------------------|-------------|------------|------------|-------------|------------|-----------|--------------|-----------|--------------------------------------------------------------------------------------------|----------------------------------------------------------------------------------------------------------------------------------------------------------------------------------|--------------------------------------------------------------------|--------------------------------------------------------------------------------------------------------------------------------|-----------------------------------------------------------------------------------------------------------------------------------------------------------------------------------------------------------------|
|                                                                                          |             |            |            |             |            |           |              |           | Show two pics, book on outside with a few words, another scene showing more advanced book. |                                                                                                                                                                                  | suggested additional details in the picture. Picture was reviewed. | have increased complexity of card.                                                                                             |                                                                                                                                                                                                                 |
| <b>25. Getting better at writing</b>                                                     | 18<br>(72%) | 2<br>(8%)  | 5<br>(20%) | 24<br>(80%) | 5<br>(17%) | 1<br>(3%) | 28<br>(97%)  | 1<br>(3%) | 0<br>(0%)                                                                                  | Show comparison                                                                                                                                                                  | Additional picture details suggested.                              | 80% said picture was clear, but qualitative data suggested additional details in the picture. Picture was reviewed.            | No change was made as adding extra detail would have increased complexity of card.                                                                                                                              |
| <b>26. Getting better at maths</b>                                                       | 19<br>(76%) | 2<br>(8%)  | 4<br>(16%) | 27<br>(90%) | 3<br>(10%) | 0<br>(0%) | 29<br>(97%)  | 1<br>(3%) | 0<br>(0%)                                                                                  | I'm sure the above goals can come under schoolwork. Perfect card!                                                                                                                | NIL                                                                | 94% said picture was clear, and qualitative data suggested card was perfect.                                                   | No change required.                                                                                                                                                                                             |
| <b>27. Developing computer, iPad/tablet and internet skills</b>                          | 22<br>(85%) | 0<br>(0%)  | 3<br>(12%) | 26<br>(90%) | 3<br>(10%) | 0<br>(0%) | 30<br>(100%) | 0<br>(0%) | 0<br>(0%)                                                                                  | NIL                                                                                                                                                                              | NIL                                                                | 90% said picture was clear, and no qualitative comments.                                                                       | No change required.                                                                                                                                                                                             |
| <b>28. Planning and completing assignments on time</b>                                   | 19<br>(76%) | 3<br>(12%) | 3<br>(12%) | 27<br>(90%) | 3<br>(10%) | 0<br>(0%) | 29<br>(97%)  | 1<br>(3%) | 0<br>(0%)                                                                                  | Schoolwork                                                                                                                                                                       | NIL                                                                | 90% said picture was clear, and no qualitative comments.                                                                       | No change required.                                                                                                                                                                                             |
| <b>29. Choosing and applying for a course to suit my interests/understanding choices</b> | 22<br>(85%) | 1<br>(4%)  | 2<br>(8%)  | 25<br>(83%) | 4<br>(13%) | 1<br>(3%) | 29<br>(97%)  | 1<br>(3%) | 0<br>(0%)                                                                                  | The goal looks a little overwhelming and scary. Used together with the words they are easily explained - not necessarily that the card needs changing/simplifying; it's too busy | Inappropriate or unnecessary details in picture.                   | 83% said picture was clear, but qualitative data suggested that there were too many unnecessary details. Picture was reviewed. | No changes were made, as the card shows a person choosing between 5 potential careers illustrated by 5 different hats (e.g., chefs' hat, fireman's hat). The objective of the card was to illustrate a range of |



|                                                        |             |            |            |             |            |            |              |           |           |                                                                                                                                                                                                                                                                                                                                                   |                                                  |                                                                                                                                   |                                                                                                                                     |  |  |  |                                    |
|--------------------------------------------------------|-------------|------------|------------|-------------|------------|------------|--------------|-----------|-----------|---------------------------------------------------------------------------------------------------------------------------------------------------------------------------------------------------------------------------------------------------------------------------------------------------------------------------------------------------|--------------------------------------------------|-----------------------------------------------------------------------------------------------------------------------------------|-------------------------------------------------------------------------------------------------------------------------------------|--|--|--|------------------------------------|
|                                                        |             |            |            |             |            |            |              |           |           |                                                                                                                                                                                                                                                                                                                                                   |                                                  |                                                                                                                                   |                                                                                                                                     |  |  |  | vocational courses to choose from. |
| <b>30. Attending classes face to face or virtually</b> | 20<br>(80%) | 2<br>(8%)  | 3<br>(12%) | 24<br>(80%) | 5<br>(17%) | 1<br>(3%)  | 28<br>(93%)  | 1<br>(3%) | 1<br>(3%) | I think it's good to see that people have choices - good to include online as an option. Thought it as "going to school"                                                                                                                                                                                                                          | No changes recommended.                          | 80% said picture was clear, and no qualitative comments did not suggest changes.                                                  | No change was made.                                                                                                                 |  |  |  |                                    |
| <b>31. Working/studying in a group</b>                 | 19<br>(76%) | 3<br>(12%) | 3<br>(12%) | 24<br>(80%) | 2<br>(7%)  | 4<br>(13%) | 29<br>(97%)  | 0<br>(0%) | 1<br>(3%) | While some Autistics may prefer, or ... be unable to work on their own due to lack of understanding, I myself (who is on the spectrum) finds it far easier to study in my own time, so this card isn't entirely necessary as it's asking you to do something that might not actually work for you; Thought this was playing games on the computer | Goals not relevant to some people.               | 76% said that the goal was clear, but Qualitative data suggested that the goal is not relevant to some people. Goal was reviewed. | No change was made, as studying in a group is a requirement of some courses and therefore may be an important goal for some people. |  |  |  |                                    |
| <b>EMPLOYMENT</b>                                      |             |            |            |             |            |            |              |           |           |                                                                                                                                                                                                                                                                                                                                                   |                                                  |                                                                                                                                   |                                                                                                                                     |  |  |  |                                    |
| <b>32. Finding a job</b>                               | 24<br>(96%) | 0<br>(0%)  | 1<br>(4%)  | 28<br>(93%) | 1<br>(3%)  | 1<br>(3%)  | 30<br>(100%) | 0<br>(0%) | 0<br>(0%) | NIL                                                                                                                                                                                                                                                                                                                                               | NIL                                              | 93% said picture was clear, and no qualitative comments.                                                                          | No change required.                                                                                                                 |  |  |  |                                    |
| <b>33. Applying for a job</b>                          | 22<br>(85%) | 1<br>(4%)  | 2<br>(8%)  | 29<br>(97%) | 0<br>(0%)  | 1<br>(3%)  | 30<br>(100%) | 0<br>(0%) | 0<br>(0%) | Once explained what it means to apply for a job etc. it made sense to her                                                                                                                                                                                                                                                                         | No changes recommended.                          | 97% said picture was clear, and qualitative comments did not suggest changes.                                                     | No change required.                                                                                                                 |  |  |  |                                    |
| <b>34. Going for a job interview</b>                   | 23<br>(92%) | 1<br>(4%)  | 1<br>(4%)  | 25<br>(83%) | 2<br>(7%)  | 3<br>(10%) | 30<br>(100%) | 0<br>(0%) | 0<br>(0%) | A lack of experience may cause some confusion without the words. The prospective employee looks as though he is sitting on the side rather than                                                                                                                                                                                                   | Inappropriate or unnecessary details in picture. | 83% said picture was clear, but qualitative comments suggested that some details were                                             | No change was made, as 83% said the image was clear.                                                                                |  |  |  |                                    |

|                                               |             |           |            |             |            |           |              |           |           |                                                                                                                                                                          |                                                 |                                                                                                                        |                                                                                                                                           |
|-----------------------------------------------|-------------|-----------|------------|-------------|------------|-----------|--------------|-----------|-----------|--------------------------------------------------------------------------------------------------------------------------------------------------------------------------|-------------------------------------------------|------------------------------------------------------------------------------------------------------------------------|-------------------------------------------------------------------------------------------------------------------------------------------|
|                                               |             |           |            |             |            |           |              |           |           | on the other side of the desk. The status is not clear.                                                                                                                  |                                                 | inappropriate. Picture was reviewed.                                                                                   |                                                                                                                                           |
| <b>35. Managing time/getting my work done</b> | 19<br>(76%) | 2<br>(8%) | 4<br>(16%) | 28<br>(93%) | 1<br>(3%)  | 1<br>(3%) | 30<br>(100%) | 0<br>(0%) | 0<br>(0%) | NIL                                                                                                                                                                      | NIL                                             | 93% said picture was clear, and no qualitative comments were made.                                                     | No change required.                                                                                                                       |
| <b>36. Getting along with co-workers</b>      | 22<br>(85%) | 0<br>(0%) | 3<br>(12%) | 25<br>(83%) | 4<br>(13%) | 1<br>(3%) | 30<br>(100%) | 0<br>(0%) | 0<br>(0%) | Some confusion because the age of the older man suggests this may be an issue regarding ageism                                                                           | Inappropriate or unnecessary details in picture | 83% said picture was clear, but qualitative data suggested that some picture details were inappropriate.               | No change was made, as the age of the co-worker was not seen to relevant.                                                                 |
| <b>37. Meeting requirements of the job</b>    | 22<br>(85%) | 1<br>(4%) | 2<br>(8%)  | 27<br>(90%) | 3<br>(10%) | 0<br>(0%) | 30<br>(100%) | 0<br>(0%) | 0<br>(0%) | Again, once explained it was better understood.                                                                                                                          | No changes recommended.                         | 90% said picture was clear, and qualitative comments did not suggest changes.                                          | No change required.                                                                                                                       |
| <b>HEALTH &amp; FITNESS</b>                   |             |           |            |             |            |           |              |           |           |                                                                                                                                                                          |                                                 |                                                                                                                        |                                                                                                                                           |
| <b>38. Keeping fit and healthy</b>            | 21<br>(84%) | 3<br>(9%) | 1<br>(4%)  | 28<br>(93%) | 2<br>(7%)  | 0<br>(0%) | 30<br>(100%) | 0<br>(0%) | 0<br>(0%) | This card is well set out and includes all the relevant information.                                                                                                     | No changes recommended.                         | 93% said picture was clear, and qualitative comments did not suggest changes.                                          | No change required                                                                                                                        |
| <b>39. Managing medication</b>                | 21<br>(84%) | 1<br>(4%) | 3<br>(12%) | 27<br>(90%) | 1<br>(3%)  | 2<br>(7%) | 30<br>(100%) | 0<br>(0%) | 0<br>(0%) | Add a pharmacist with medication. Picture could have a pharmacist connected in some way with the medication. They are part of the process of managing this area of life. | Additional picture details suggested.           | 90% said picture was clear, but qualitative data suggested adding additional details to picture. Picture was reviewed. | Picture not changed, as adding a pharmacist to the mage would have made it too busy and complex. Wording was changed to indicate the need |

|                                                      |             |            |            |              |            |           |              |           |           |                                                                                 |                                  |                                                                                                                                |                                                                                                                                         |                                      |
|------------------------------------------------------|-------------|------------|------------|--------------|------------|-----------|--------------|-----------|-----------|---------------------------------------------------------------------------------|----------------------------------|--------------------------------------------------------------------------------------------------------------------------------|-----------------------------------------------------------------------------------------------------------------------------------------|--------------------------------------|
|                                                      |             |            |            |              |            |           |              |           |           |                                                                                 |                                  |                                                                                                                                |                                                                                                                                         | to go the chemist to get medication. |
| <b>40. Making and attending medical appointments</b> | 19<br>(76%) | 2<br>(8%)  | 4<br>(16%) | 26<br>(87%)  | 3<br>(10%) | 1<br>(3%) | 30<br>(100%) | 0<br>(0%) | 0<br>(0%) | Doctor picture needs to be more obvious                                         | Meaning of picture is not clear. | 87% said picture was clear but qualitative data suggested that meaning of picture is not clear. Picture was reviewed.          | No change was made, as the picture includes details to explain the meaning (the doctor's name is on the door and he has a stethoscope). |                                      |
| <b>41. Birth control/safe sex</b>                    | 19<br>(76%) | 2<br>(8%)  | 4<br>(16%) | 27<br>(90%)  | 2<br>(7%)  | 1<br>(3%) | 30<br>(100%) | 0<br>(0%) | 0<br>(0%) | Safe sex; inexperience and lack of exposure to these images may mean confusion. | Meaning of picture is not clear. | 90% said picture was clear but qualitative data suggested that meaning of picture is not clear. Picture was reviewed.          | No change was made as there is no apparent way to make this picture clearer.                                                            |                                      |
| <b>COMMUNITY ACCESS AND PARTICIPATION</b>            |             |            |            |              |            |           |              |           |           |                                                                                 |                                  |                                                                                                                                |                                                                                                                                         |                                      |
| <b>42. Using public facilities</b>                   | 21<br>(84%) | 3<br>(12%) | 1<br>(4%)  | 27<br>(90%)  | 3<br>(10%) | 0<br>(0%) | 29<br>(97%)  | 1<br>(3%) | 0<br>(0%) | No because most people know these places; Perfect ??                            | No changes recommended.          | 25% said no or not sure about picture, although there were no qualitative comments recommending changes. Picture was reviewed. | As there was some confusion about the picture, a new picture was created to include a streetscape with public facilities                |                                      |
| <b>43. Shopping</b>                                  | 22<br>(85%) | 1<br>(4%)  | 2<br>(8%)  | 30<br>(100%) | 0<br>(0%)  | 0<br>(0%) | 30<br>(100%) | 0<br>(0%) | 0<br>(0%) | Perfect ??                                                                      | No changes recommended.          | 100% said picture was clear and there were no qualitative comments recommending changes.                                       | No change required.                                                                                                                     |                                      |
| <b>44. Using public transport/catching taxis</b>     | 17<br>(68%) | 1<br>(4%)  | 7<br>(28%) | 26<br>(87%)  | 3<br>(10%) | 1<br>(3%) | 29<br>(97%)  | 0<br>(0%) | 1<br>(3%) | NIL                                                                             | NIL                              | 88% said picture was clear and there were no qualitative                                                                       | No change required.                                                                                                                     |                                      |

|                                                   |             |            |            |             |            |            |             |           |           |                                                                                                                                                            |                                                  |                                                                                                                |                                                            |
|---------------------------------------------------|-------------|------------|------------|-------------|------------|------------|-------------|-----------|-----------|------------------------------------------------------------------------------------------------------------------------------------------------------------|--------------------------------------------------|----------------------------------------------------------------------------------------------------------------|------------------------------------------------------------|
|                                                   |             |            |            |             |            |            |             |           |           |                                                                                                                                                            |                                                  | comments recommending changes.                                                                                 |                                                            |
| <b>45. Planning journeys/how to get somewhere</b> | 18<br>(72%) | 3<br>(12%) | 4<br>(16%) | 25<br>(83%) | 5<br>(17%) | 0<br>(0%)  | 29<br>(97%) | 1<br>(3%) | 0<br>(0%) | Not sure the picture looks like a map; it would be too stressful for a person with autism                                                                  | Meaning of picture is not clear.                 | 83% said picture was clear, but qualitative data suggested that the picture was unclear. Picture was reviewed. | The picture was changed to appear more like a Google™ map. |
| <b>46. Getting licence/driving a car</b>          | 20<br>(80%) | 3<br>(12%) | 2<br>(8%)  | 25<br>(83%) | 2<br>(7%)  | 3<br>(10%) | 29<br>(97%) | 0<br>(0%) | 1<br>(3%) | Perfect ??                                                                                                                                                 |                                                  |                                                                                                                |                                                            |
| <b>47. Buying and maintaining a car</b>           | 15<br>(60%) | 2<br>(8%)  | 8<br>(32%) | 23<br>(77%) | 4<br>(13%) | 3<br>(10%) | 28<br>(93%) | 0<br>(0%) | 2<br>(6%) | Would put proper price on car as is confusing or is that the message, make them aware? They're easy targets to get ripped off? Bit confusing but good card | Inappropriate or unnecessary details in picture. | 77% said picture was clear, but qualitative data suggested that the picture was unclear. Picture was reviewed. | Picture altered to make dollar symbol clearer (\$\$\$).    |
| <b>48. Volunteering</b>                           | 17<br>(68%) | 3<br>(12%) | 5<br>(20%) | 22<br>(69%) | 4<br>(14%) | 3<br>(10%) | 29<br>(97%) | 0<br>(0%) | 1<br>(3%) | NIL                                                                                                                                                        | NIL                                              | 69% said picture was clear, but qualitative comments did not suggest changes.                                  | No change required                                         |
| <b>49. Going on holidays/travelling</b>           | 22<br>(85%) | 3<br>(12%) | 0<br>(0%)  | 27<br>(90%) | 3<br>(10%) | 0<br>(0%)  | 28<br>(93%) | 2<br>(6%) | 0<br>(0%) | NIL                                                                                                                                                        | NIL                                              | 90% said picture was clear, and qualitative comments did not suggest changes.                                  | No change required                                         |
| <b>COMMUNICATION</b>                              |             |            |            |             |            |            |             |           |           |                                                                                                                                                            |                                                  |                                                                                                                |                                                            |

|                                                                                |                                                           |                                                           |                                                          |                                                                                                                                                                                             |                                                      |                                                                                                                                            |                                                                                                                           |
|--------------------------------------------------------------------------------|-----------------------------------------------------------|-----------------------------------------------------------|----------------------------------------------------------|---------------------------------------------------------------------------------------------------------------------------------------------------------------------------------------------|------------------------------------------------------|--------------------------------------------------------------------------------------------------------------------------------------------|---------------------------------------------------------------------------------------------------------------------------|
| <p><b>50. Letting others know my needs/feelings/what's important to me</b></p> | <p>23<br/>(92%)</p> <p>0<br/>(0%)</p> <p>2<br/>(8%)</p>   | <p>22<br/>(73%)</p> <p>5<br/>(17%)</p> <p>3<br/>(10%)</p> | <p>29<br/>(97%)</p> <p>0<br/>(0%)</p> <p>1<br/>(3%)</p>  | <p>I don't know what self-advocacy means. It's a good goal though. perhaps using speech bubbles for people talking; Put things in image of what are important he could be talking about</p> | <p>Additional picture details suggested.</p>         | <p>27% said no or not sure about picture clarity, and qualitative data suggested adding additional details. Picture was reviewed.</p>      | <p>Details were added to the picture to provide clarity: a speech bubble saying "What I need is..."</p>                   |
| <p><b>51. Understanding others/follow instructions</b></p>                     | <p>21<br/>(84%)</p> <p>1<br/>(4%)</p> <p>3<br/>(12%)</p>  | <p>22<br/>(73%)</p> <p>5<br/>(17%)</p> <p>3<br/>(10%)</p> | <p>28<br/>(93%)</p> <p>1<br/>(3%)</p> <p>1<br/>(3%)</p>  | <p>Two scenes, her listening, her doing the actions; the arrow is confusing, need bigger thumb</p>                                                                                          | <p>Additional picture details suggested.</p>         | <p>27% said no or not sure about picture clarity, and qualitative data suggested adding additional details. Picture was reviewed.</p>      | <p>A speech bubble saying "Got it" was added, to provide clarity.</p>                                                     |
| <p><b>52. Asking for/accepting help</b></p>                                    | <p>22<br/>(85%)</p> <p>2<br/>(8%)</p> <p>1<br/>(4%)</p>   | <p>26<br/>(87%)</p> <p>3<br/>(10%)</p> <p>1<br/>(3%)</p>  | <p>30<br/>(100%)</p> <p>0<br/>(0%)</p> <p>0<br/>(0%)</p> | <p>Perfect ??</p>                                                                                                                                                                           | <p>No changes recommended.</p>                       | <p>87% said picture was clear, and there were no qualitative comments.</p>                                                                 | <p>No changes required.</p>                                                                                               |
| <p><b>53. Using non-verbal communication</b></p>                               | <p>19<br/>(76%)</p> <p>3<br/>(12%)</p> <p>3<br/>(12%)</p> | <p>27<br/>(90%)</p> <p>2<br/>(7%)</p> <p>1<br/>(3%)</p>   | <p>30<br/>(100%)</p> <p>0<br/>(0%)</p> <p>0<br/>(0%)</p> | <p>I didn't understand what the hands were doing. Is it meant to be a handshake?</p>                                                                                                        | <p>Non-verbal behaviours do not reflect meaning.</p> | <p>90% said picture was clear, but qualitative data suggested that non-verbal behaviours do not reflect meaning. Picture was reviewed.</p> | <p>The picture was not changed, as there was no apparent way to make the picture clearer,</p>                             |
| <p><b>54. Starting conversations/greeting people</b></p>                       | <p>20<br/>(80%)</p> <p>2<br/>(8%)</p> <p>3<br/>(12%)</p>  | <p>26<br/>(87%)</p> <p>2<br/>(7%)</p> <p>2<br/>(7%)</p>   | <p>30<br/>(100%)</p> <p>0<br/>(0%)</p> <p>0<br/>(0%)</p> | <p>The lady looks a bit confused. Looks like she's screaming; That's a really extroverted "Hi!"</p>                                                                                         | <p>Non-verbal behaviours do not reflect meaning.</p> | <p>87% said picture was clear, but qualitative data suggested that non-verbal behaviours do not reflect meaning.</p>                       | <p>The non-verbal behaviours of female character were changed, so that her eyes are looking directly at person she is</p> |

|                                                                      |             |           |            |              |            |            |              |           |           |                                                                                                                                                                                                                                                                                                                                                                     |                                                                                |                                                                                                                                                               |                                                                                                                                                                                                                         |
|----------------------------------------------------------------------|-------------|-----------|------------|--------------|------------|------------|--------------|-----------|-----------|---------------------------------------------------------------------------------------------------------------------------------------------------------------------------------------------------------------------------------------------------------------------------------------------------------------------------------------------------------------------|--------------------------------------------------------------------------------|---------------------------------------------------------------------------------------------------------------------------------------------------------------|-------------------------------------------------------------------------------------------------------------------------------------------------------------------------------------------------------------------------|
|                                                                      |             |           |            |              |            |            |              |           |           |                                                                                                                                                                                                                                                                                                                                                                     |                                                                                | Picture was reviewed.                                                                                                                                         | greeting, and expression is friendlier.                                                                                                                                                                                 |
| <b>55. Participating in a conversation</b>                           | 22<br>(85%) | 2<br>(8%) | 1<br>(4%)  | 25<br>(83%)  | 2<br>(7%)  | 3<br>(10%) | 29<br>(97%)  | 0<br>(0%) | 1<br>(3%) | Could have some words in talk bubbles. I'd have them face each other, their faces look more scary than happy and relaxed, especially the boy's. maybe the arrows are showing a give and take, exchange of things. Perhaps they are both talking at the same time instead of taking turns. Perhaps the arrows are good as they bring up these situations to discuss. | Meaning of picture is not clear. Non-verbal behaviours do not reflect meaning. | 83% said picture was clear, but qualitative data suggests the picture is unclear with non-verbal behaviours that do not reflect meaning. Picture was reviewed | The non-verbal behaviours were changed so that character on the left is giving more direct eye contact and orientated more to face the character on the right. Arrows were added to show give and take of conversation. |
| <b>56. Knowing what is appropriate to talk about, with who/where</b> | 19<br>(76%) | 1<br>(4%) | 5<br>(20%) | 25<br>(83%)  | 4<br>(13%) | 1<br>(3%)  | 29<br>(97%)  | 0<br>(0%) | 1<br>(3%) | Again, change the faces!                                                                                                                                                                                                                                                                                                                                            | Non-verbal behaviours do not reflect meaning.                                  | As 83% said picture was clear, but qualitative data suggested that non-verbal behaviours that do not reflect meaning. Picture was reviewed                    | Facial expressions were changed following previous survey, so no further changes were made.                                                                                                                             |
| <b>57. Using phone/mobile/email</b>                                  | 23<br>(92%) | 0<br>(0%) | 1<br>(4%)  | 30<br>(100%) | 0<br>(0%)  | 0<br>(0%)  | 30<br>(100%) | 0<br>(0%) | 0<br>(0%) | To be honest I only know one Autistic that isn't on top of their emails, so this card mightn't be that necessary. Online safety                                                                                                                                                                                                                                     | Goals not relevant to some people.                                             | 92% said goal is important and 100% said picture was clear, but qualitative data suggested that goal may not be relevant to some people. Picture was reviewed | Picture was not changed, but wording has been changed to "Using technology to communicate (e.g., via phone, text, email or social media)" to accommodate use of social media and online safety.                         |

|                                          |             |            |            |             |            |            |              |           |           |                                                                                                                                                     |                                  |                                                                                                                                       |                                                                                                                                                                                                                |
|------------------------------------------|-------------|------------|------------|-------------|------------|------------|--------------|-----------|-----------|-----------------------------------------------------------------------------------------------------------------------------------------------------|----------------------------------|---------------------------------------------------------------------------------------------------------------------------------------|----------------------------------------------------------------------------------------------------------------------------------------------------------------------------------------------------------------|
| <b>58. Giving instructions to others</b> | 20<br>(80%) | 2<br>(8%)  | 3<br>(12%) | 23<br>(77%) | 4<br>(13%) | 3<br>(10%) | 30<br>(100%) | 0<br>(0%) | 0<br>(0%) | Is the person writing the instructions down, just writing?                                                                                          | Meaning of picture is not clear. | 23% said no/not sure about picture clarity and qualitative data suggests the picture is unclear. Picture was reviewed                 | To add clarity to the picture, a speech bubble was added with the text "Could you please..."                                                                                                                   |
| FINANCES                                 |             |            |            |             |            |            |              |           |           |                                                                                                                                                     |                                  |                                                                                                                                       |                                                                                                                                                                                                                |
| <b>59. Making purchases</b>              | 21<br>(84%) | 1<br>(4%)  | 3<br>(12%) | 27<br>(90%) | 2<br>(7%)  | 1<br>(3%)  | 29<br>(100%) | 0<br>(0%) | 0<br>(0%) | NIL                                                                                                                                                 | NIL                              | 90% said picture was clear, and no qualitative comments were made.                                                                    | No change was required.                                                                                                                                                                                        |
| <b>60. Managing money</b>                | 20<br>(80%) | 3<br>(12%) | 2<br>(8%)  | 26<br>(87%) | 2<br>(7%)  | 2<br>(7%)  | 29<br>(97%)  | 0<br>(0%) | 1<br>(3%) | NIL                                                                                                                                                 | NIL                              | 87% said picture was clear, and no qualitative comments were made.                                                                    | No change was required.                                                                                                                                                                                        |
| <b>61. Understanding contracts</b>       | 17<br>(71%) | 5<br>(21%) | 2<br>(8%)  | 23<br>(77%) | 4<br>(13%) | 3<br>(10%) | 27<br>(90%)  | 1<br>(3%) | 2<br>(6%) | Show what a contract gets, like a car, house etc.; inexperience may mean some confusion; Card alone didn't make sense, card and words together did. | Meaning of picture is not clear. | 23% said no/not sure about picture clarity and qualitative data suggested that meaning of picture is not clear. Picture was reviewed. | The picture had already been changed following the previous survey and there is no apparent way to make it clearer. People using the AAGST who don't understand this concept are unlikely to choose this goal. |
| <b>62. Doing tax returns</b>             | 18<br>(72%) | 4<br>(16%) | 3<br>(12%) | 23<br>(79%) | 4<br>(14%) | 2<br>(7%)  | 27<br>(93%)  | 2<br>(6%) | 0<br>(0%) | Doesn't even understand what this is all about; inexperience may mean some confusion                                                                | Meaning of picture is not clear. | 21% said no or not sure about picture clarity, and qualitative data                                                                   | There was no apparent way to make it clearer. People using the                                                                                                                                                 |

|                                                                                |             |           |            |             |            |           |              |           |           |                                                                                                                                                   |                                  | suggested that meaning of picture is not clear. Picture was reviewed.                                           | AAGST who don't understand this concept are unlikely to choose this goal.    |
|--------------------------------------------------------------------------------|-------------|-----------|------------|-------------|------------|-----------|--------------|-----------|-----------|---------------------------------------------------------------------------------------------------------------------------------------------------|----------------------------------|-----------------------------------------------------------------------------------------------------------------|------------------------------------------------------------------------------|
| EMOTIONAL WELLBEING                                                            |             |           |            |             |            |           |              |           |           |                                                                                                                                                   |                                  |                                                                                                                 |                                                                              |
| <b>63. Staying calm/Understanding and managing own emotions and behaviours</b> | 21<br>(84%) | 1<br>(4%) | 3<br>(12%) | 28<br>(93%) | 2<br>(7%)  | 0<br>(0%) | 30<br>(100%) | 0<br>(0%) | 0<br>(0%) | Perfect??                                                                                                                                         | No changes recommended.          | 93% said picture was clear, and there were no qualitative comments.                                             | No changes required.                                                         |
| <b>64. Getting emotional support</b>                                           | 21<br>(84%) | 1<br>(4%) | 3<br>(12%) | 27<br>(90%) | 3<br>(10%) | 0<br>(0%) | 30<br>(100%) | 0<br>(0%) | 0<br>(0%) | Perfect??                                                                                                                                         | No changes recommended.          | 90% said picture was clear, and there were no qualitative comments.                                             | No changes required.                                                         |
| <b>65. Preparing for change</b>                                                | 23<br>(92%) | 2<br>(8%) | 0<br>(0%)  | 26<br>(87%) | 4<br>(13%) | 0<br>(0%) | 29<br>(97%)  | 0<br>(0%) | 1<br>(3%) | I don't understand what's going on. I find the picture confusing, I'm not sure which is plan A or plan B? A great goal to have though. Perfect ?? | Meaning of picture is not clear. | 87% said picture was clear, but qualitative comments suggest that the picture is unclear. Picture was reviewed. | The picture was altered to show plan A being changed to plan B more clearly. |
| <b>66. Relaxing</b>                                                            | 22<br>(85%) | 1<br>(4%) | 2<br>(8%)  | 28<br>(93%) | 2<br>(7%)  | 0<br>(0%) | 29<br>(100%) | 0<br>(0%) | 0<br>(0%) | Perfect ?? although some people may have other ideas about what relaxation is. This is relaxation to NT's.                                        | No changes recommended.          | 93% said picture was clear, and there were no qualitative comments.                                             | No changes required.                                                         |
| <b>67. Coping with sensory challenges</b>                                      | 23<br>(92%) | 1<br>(4%) | 1<br>(4%)  | 28<br>(93%) | 1<br>(3%)  | 1<br>(3%) | 30<br>(100%) | 0<br>(0%) | 0<br>(0%) | Perfect??                                                                                                                                         | No changes recommended.          | 93% said picture was clear, and there were no qualitative comments.                                             | No changes required.                                                         |



|                                                           |              |           |            |             |            |            |              |           |           |                                                                                                                                                                                                                                                |                                                  |                                                                                                                       |                                                                                                                                                                 |
|-----------------------------------------------------------|--------------|-----------|------------|-------------|------------|------------|--------------|-----------|-----------|------------------------------------------------------------------------------------------------------------------------------------------------------------------------------------------------------------------------------------------------|--------------------------------------------------|-----------------------------------------------------------------------------------------------------------------------|-----------------------------------------------------------------------------------------------------------------------------------------------------------------|
| <b>68. Doing activities I enjoy</b>                       | 25<br>(100%) | 0<br>(0%) | 0<br>(0%)  | 28<br>(97%) | 1<br>(3%)  | 0<br>(0%)  | 30<br>(100%) | 0<br>(0%) | 0<br>(0%) | Perfect??                                                                                                                                                                                                                                      | No changes recommended.                          | 93% said picture was clear, and there were no qualitative comments.                                                   | No changes required.                                                                                                                                            |
| <b>69. Staying safe</b>                                   | 22<br>(85%)  | 0<br>(0%) | 3<br>(12%) | 25<br>(83%) | 2<br>(7%)  | 3<br>(10%) | 30<br>(100%) | 0<br>(0%) | 0<br>(0%) | This isn't really something to include in the card but in my experience once people know you dislike being touched, they tend to just do it more...; perhaps the person could be androgynous                                                   | Inappropriate or unnecessary details in picture. | 83% said picture was clear but qualitative data suggested that some details are inappropriate. Picture was reviewed.  | There was no apparent way to make it clearer, no change was made. Making the person androgynous, may have confused the meaning (inappropriate sexual advances). |
| <b>70. Understanding/explaining Autism</b>                | 22<br>(85%)  | 0<br>(0%) | 3<br>(12%) | 26<br>(87%) | 0<br>(0%)  | 4<br>(13%) | 28<br>(93%)  | 1<br>(3%) | 1<br>(3%) | Yes, this card is very important; The rainbow may be confusing lately.                                                                                                                                                                         | Inappropriate or unnecessary details in picture. | 87% said picture was clear but qualitative data suggested picture details may be inappropriate. Picture was reviewed. | No change was made. Rainbow infinity symbol representing autism was suggested by previous survey respondents and so was retained.                               |
| <b>71. Connecting with others in the Autism community</b> | 20<br>(80%)  | 2<br>(8%) | 3<br>(12%) | 25<br>(83%) | 3<br>(10%) | 2<br>(7%)  | 28<br>(97%)  | 1<br>(3%) | 0<br>(0%) | People are connecting but of course there is no way to ascertain just from a picture that they are autistic.                                                                                                                                   | No changes recommended.                          | 83% said picture was clear, and there were no qualitative comments.                                                   | No changes required.                                                                                                                                            |
| <b>72. Exploring/meeting spiritual needs</b>              | 17<br>(68%)  | 2<br>(8%) | 6<br>(24%) | 23<br>(77%) | 5<br>(17%) | 2<br>(7%)  | 27<br>(90%)  | 2<br>(6%) | 1<br>(3%) | I may be biased as I don't believe in any religions or higher powers or gods but, this card is actually kind of offensive to Atheists like me, and I'm pretty hard to offend, this card says spiritual NEEDS, suggesting going to worship some | Goal not relevant to some people.                | 68% said that goal was important, but qualitative data suggested that the goal may not be relevant to some people.    | Goal retained, as religion is important to some people. The wording was changed to include these examples: "e.g., religious                                     |

|  |  |  |  |                                                                                                                                                                                                                                           |  |  |                                                                                          |
|--|--|--|--|-------------------------------------------------------------------------------------------------------------------------------------------------------------------------------------------------------------------------------------------|--|--|------------------------------------------------------------------------------------------|
|  |  |  |  | imaginary man in the sky is a requirement to survive as a biological entity, this is factually false, and kind of offensive, this card should be changed so that it makes it clear this only applies if you actually believe in religion; |  |  | activities or meditation” to make it clear that spirituality is not only about religion. |
|--|--|--|--|-------------------------------------------------------------------------------------------------------------------------------------------------------------------------------------------------------------------------------------------|--|--|------------------------------------------------------------------------------------------|
